# Supplementary material for: Cu-catalyzed coupling of vinylidene cyclopropanes with allyl and allenyl boronates
Source: Royal Society of Chemistry journal article supplement (doi:10.1039/d1cc03823k), 2021-01-01

# Cu-Catalyzed Coupling of Vinylidene Cyclopropanes with Allyl and Allenyl Boronates

*Ming Chen\**

Department of Chemistry and Biochemistry

Auburn University

E-mail: [mzc0102@auburn.edu](mailto:mzc0102@auburn.edu)

Supporting Information: Experimental Procedures, Tabulated Spectroscopic Data,  $^1\text{H}$  and

$^{13}\text{C}$  Spectra of New Compounds

**General Experimental Details.** All reaction solvents were purified before use. Tetrahydrofuran, diethyl ether and toluene were purified by passing through a solvent column composed of activated A-1 alumina. Unless indicated otherwise, all reactions were conducted under an atmosphere of argon using flame-dried or oven-dried (120 °C) glassware. The term “concentrated under reduced pressure” refers to the removal of solvents and other volatile materials using a rotary evaporator with the water bath temperature below 30 °C, followed by the removal of residual solvents at high vacuum (< 0.2 mbar).

Proton nuclear magnetic resonance ( $^1\text{H}$  NMR) spectra were acquired on commercial instruments (500 and 600 MHz) at Auburn University NMR facility. Carbon-13 nuclear magnetic resonance ( $^{13}\text{C}$  NMR) spectra were acquired at 126 and 151 MHz. The proton signal for the residual non-deuterated solvent ( $\delta$  7.26 for chloroform and  $\delta$  2.05 for acetone) was used as an internal reference for  $^1\text{H}$  NMR spectra. For  $^{13}\text{C}$  NMR spectra, chemical shifts are reported relative to the resonance of chloroform ( $\delta$  77.36) and acetone ( $\delta$  29.84). Coupling constants are reported in Hz. High-resolution mass spectra were recorded on a commercial high-resolution mass spectrometer via the Micro Mass/Analytical Facility operated by the College of Chemistry and Biochemistry, Auburn University.

Analytical thin layer chromatography (TLC) was performed on Kieselgel 60 F254 glass plates precoated with a 0.25 mm thickness of silica gel. The TLC plates were visualized with UV light and/or by staining with Hanessian solution (ceric sulfate and ammonium molybdate in aqueous sulfuric acid) or  $\text{KMnO}_4$ . Column chromatography was generally performed using Kieselgel 60 (230-400 mesh) silica gel, typically using a 50-100:1 weight ratio of silica gel to crude product.

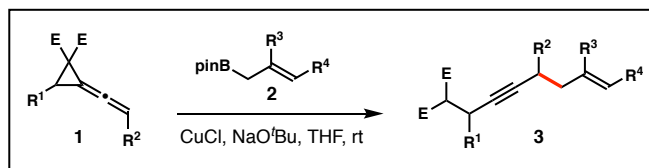

**General procedure for the syntheses of compounds 3:** In an Ar-filled glove box, to a reaction vial containing a Teflon-coated magnetic stirring bar were added CuCl (0.01 mmol, 10 mol %), NaO'Bu (0.12 mmol, 1.2 equiv) and THF (0.5 mL). The mixture was stirred for 15 min at ambient temperature. Allylboronate **2** (0.11 mmol, 1.1 equiv) was then added and the mixture was stirred for 5 min. Vinylidene cyclopropane **1** (0.1 mmol, 1.0 equiv) was added and the mixture was stirred for 3 – 6 h at ambient temperature. Upon complete consumption of vinylidene cyclopropane **1**, the reaction mixture was filtered through a pad of silica gel and the solution was concentrated under reduced pressure. Purification of the crude product was performed by column chromatography (gradient elution with hexane and ethyl acetate) to give product **3**.

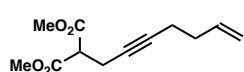

**Dimethyl 2-(hept-6-en-2-yn-1-yl)malonate (3a)** Prepared according to the general procedure. The crude mixture was purified

by column chromatography (gradient elution, hexane:ethyl acetate = 20:1 to 15:1) to give the title compound as colorless oil in 85% yield (19 mg). <sup>1</sup>H NMR (500 MHz, CDCl<sub>3</sub>) δ 5.78 – 5.86 (m, 1H), 4.99 – 5.06 (m, 2H), 3.76 (s, 6H), 3.56 (t, *J* = 7.8 Hz, 1H), 2.75 (d, *J* = 7.7 Hz, 2H), 2.20 (*app. s.*, 4H). <sup>13</sup>C NMR (126 MHz, CDCl<sub>3</sub>) δ 168.9, 137.3, 115.8, 82.3, 76.3, 53.1, 51.9, 33.3, 19.3, 18.8. HRMS (ESI<sup>+</sup>): *m/z* for C<sub>16</sub>H<sub>25</sub>O<sub>4</sub> [M+H]<sup>+</sup> calcd. 281.1753, found 281.1752. HRMS (ESI<sup>+</sup>): *m/z* for C<sub>12</sub>H<sub>16</sub>O<sub>4</sub>Na [M+Na]<sup>+</sup> calcd. 247.0946, found 247.0947.

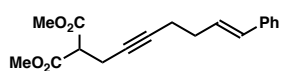

**Dimethyl (E)-2-(7-phenylhept-6-en-2-yn-1-yl)malonate (3b)**

Prepared according to the general procedure. The crude mixture was purified by column chromatography (gradient elution, hexane:ethyl acetate = 20:1 to 15:1) to give the title compound as colorless oil in 73% yield (22 mg, *E:Z* > 20:1). <sup>1</sup>H NMR (500 MHz, CDCl<sub>3</sub>) δ 7.36 (d, *J* = 7.8 Hz, 2H), 7.30 (dd, *J* = 7.5, 7.5 Hz, 2H), 7.20 (dd, *J* = 7.1, 7.1 Hz, 1H), 6.42 (d, *J* = 15.8 Hz, 1H), 6.24 (dt, *J* = 15.8, 6.7 Hz, 1H), 3.73 (s, 6H), 3.57 (t, *J* = 7.5 Hz, 1H), 2.77 (d, *J* = 7.3 Hz, 2H), 2.36 (dt, *J* = 7.1, 6.7 Hz, 2H), 2.29 (t, *J* = 6.9 Hz, 2H). <sup>13</sup>C NMR (126 MHz, CDCl<sub>3</sub>) δ 168.9, 137.9, 131.2, 129.1, 128.8, 127.4, 126.4, 82.2, 76.5, 53.1, 51.9, 32.7, 19.35, 19.30. HRMS (ESI<sup>+</sup>): *m/z* for C<sub>18</sub>H<sub>21</sub>O<sub>4</sub> [M+H]<sup>+</sup> calcd. 301.1440, found 301.1430.

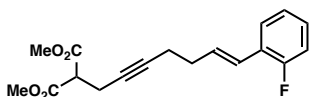

**Dimethyl (*E*)-2-(7-(2-fluorophenyl)hept-6-en-2-yn-1-yl)malonate (3c)** Prepared according to the general procedure. The crude mixture was purified by column chromatography

(gradient elution, hexane:ethyl acetate = 20:1 to 15:1) to give the title compound as colorless oil in 85% yield (27 mg, *E:Z* > 20:1). <sup>1</sup>H NMR (500 MHz, CDCl<sub>3</sub>) δ 7.45 (dd, *J* = 7.7, 7.7 Hz, 1H), 7.16 – 7.18 (m, Hz, 1H), 7.08 (dd, *J* = 7.5, 7.5 Hz, 1H), 7.01 (dd, *J* = 9.8, 9.2 Hz, 1H), 6.58 (d, *J* = 16.0 Hz, 1H), 6.31 (dt, *J* = 16.0, 6.8 Hz, 1H), 3.74 (s, 6H), 3.57 (t, *J* = 7.6 Hz, 1H), 2.77 (d, *J* = 7.6 Hz, 2H), 2.39 (dt, *J* = 7.0, 6.7 Hz, 2H), 2.30 (t, *J* = 6.8 Hz, 2H). <sup>13</sup>C NMR (126 MHz, CDCl<sub>3</sub>) δ 168.9, 160.3 (d, *J* = 986.6 Hz), 131.8 (d, *J* = 17.9 Hz), 128.6 (d, *J* = 33.4 Hz), 127.5 (d, *J* = 15.8 Hz), 125.6 (d, *J* = 48.4 Hz), 124.4 (d, *J* = 14.2 Hz), 123.6 (d, *J* = 14.7 Hz), 115.9 (d, *J* = 87.9 Hz), 82.0, 76.7, 53.0, 51.9, 33.0, 19.3, 19.2. HRMS (ESI<sup>+</sup>): *m/z* for C<sub>18</sub>H<sub>20</sub>FO<sub>4</sub> [M+H]<sup>+</sup> calcd. 319.1346, found 319.1331.

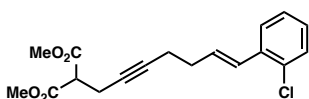

**Dimethyl (*E*)-2-(7-(2-chlorophenyl)hept-6-en-2-yn-1-yl)malonate (3d)** Prepared according to the general procedure. The crude mixture was purified by column chromatography

(gradient elution, hexane:ethyl acetate = 20:1 to 15:1) to give the title compound as colorless oil in 81% yield (27 mg, *E:Z* > 20:1). <sup>1</sup>H NMR (500 MHz, CDCl<sub>3</sub>) δ 7.53 (d, *J* = 7.7 Hz, 1H), 7.33 (d, *J* = 7.9 Hz, 1H), 7.21 (dd, *J* = 7.5, 7.5 Hz, 1H), 7.14 (dd, *J* = 7.6, 7.6 Hz, 1H), 6.80 (d, *J* = 15.8 Hz, 1H), 6.23 (dt, *J* = 15.8, 6.8 Hz, 1H), 3.73 (s, 6H), 3.58 (t, *J* = 7.8 Hz, 1H), 2.77 (d, *J* = 7.6 Hz, 2H), 2.41 (dt, *J* = 7.0, 6.8 Hz, 2H), 2.31 (t, *J* = 6.8 Hz, 2H). <sup>13</sup>C NMR (126 MHz, CDCl<sub>3</sub>) δ 168.9, 135.9, 133.0, 132.1, 129.9, 128.5, 127.5, 127.12, 127.10, 82.0, 76.7, 53.0, 51.9, 32.8, 19.29, 19.25. HRMS (ESI<sup>+</sup>): *m/z* for C<sub>18</sub>H<sub>20</sub>ClO<sub>4</sub> [M+H]<sup>+</sup> calcd. 335.1050, found 335.1051.

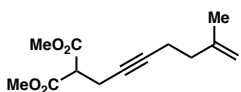

**Dimethyl 2-(6-methylhept-6-en-2-yn-1-yl)malonate (3e)** Prepared according to the general procedure. The crude mixture was purified by column chromatography (gradient elution, hexane:ethyl acetate =

20:1 to 15:1) to give the title compound as colorless oil in 84% yield (20 mg). <sup>1</sup>H NMR (500 MHz, CDCl<sub>3</sub>) δ 4.74 (s, 1H), 4.69 (s, 1H), 3.76 (s, 6H), 3.55 (t, *J* = 7.7 Hz, 1H), 2.75 (d, *J* = 7.7 Hz, 2H), 2.25 (t, *J* = 7.3 Hz, 2H), 2.16 (t, *J* = 7.3 Hz, 2H), 1.71 (s, 3H). <sup>13</sup>C NMR (126 MHz, CDCl<sub>3</sub>) δ 168.9, 144.5, 111.0, 82.5, 76.2, 53.0, 51.9, 37.2, 22.6, 19.3, 17.7. HRMS (ESI<sup>+</sup>): *m/z* for C<sub>13</sub>H<sub>19</sub>O<sub>4</sub> [M+H]<sup>+</sup> calcd. 239.1283, found 239.1289.

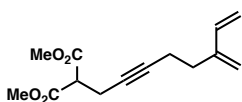

**Dimethyl 2-(6-methyleneoct-7-en-2-yn-1-yl)malonate (3f)**

Prepared according to the general procedure. The crude mixture was purified by column chromatography (gradient elution, hexane:ethyl acetate = 20:1 to 15:1) to give the title compound as colorless oil in 72% yield (18 mg).  $^1\text{H}$  NMR (500 MHz,  $\text{CDCl}_3$ )  $\delta$  6.35 (dd,  $J = 17.6, 10.8$  Hz, 1H), 5.20 (d,  $J = 17.7$  Hz, 1H), 5.02 – 5.07 (m, 3H), 3.76 (s, 6H), 3.56 (t,  $J = 7.7$  Hz, 1H), 2.75 (d,  $J = 7.7$  Hz, 2H), 2.38 (t,  $J = 7.4$  Hz, 2H), 2.31 (t,  $J = 6.7$  Hz, 2H).  $^{13}\text{C}$  NMR (126 MHz,  $\text{CDCl}_3$ )  $\delta$  168.9, 144.9, 138.8, 116.7, 113.6, 82.5, 76.4, 53.1, 51.9, 31.1, 19.3, 18.1. HRMS (ESI $^+$ ):  $m/z$  for  $\text{C}_{14}\text{H}_{18}\text{O}_4\text{Na}$   $[\text{M}+\text{Na}]^+$  calcd. 273.1103, found 273.1101.

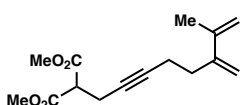

**Dimethyl 2-(7-methyl-6-methyleneoct-7-en-2-yn-1-yl)malonate (3g)**

Prepared according to the general procedure. The crude mixture was purified by column chromatography (gradient elution, hexane:ethyl acetate = 20:1 to 15:1) to give the title compound as colorless oil in 83% yield (22 mg).  $^1\text{H}$  NMR (500 MHz,  $\text{CDCl}_3$ )  $\delta$  5.12 (s, 1H), 5.04 (s, 1H), 4.98 (s, 2H), 3.76 (s, 6H), 3.56 (t,  $J = 7.7$  Hz, 1H), 2.75 (d,  $J = 7.5$  Hz, 2H), 2.44 (t,  $J = 7.5$  Hz, 2H), 2.29 (t,  $J = 7.1$  Hz, 2H), 1.90 (s, 3H).  $^{13}\text{C}$  NMR (126 MHz,  $\text{CDCl}_3$ )  $\delta$  168.9, 146.4, 142.5, 113.2, 112.9, 82.6, 76.3, 53.1, 51.9, 33.4, 21.4, 19.3, 18.8. HRMS (ESI $^+$ ):  $m/z$  for  $\text{C}_{15}\text{H}_{20}\text{O}_4\text{Na}$   $[\text{M}+\text{Na}]^+$  calcd. 287.1259, found 287.1261.

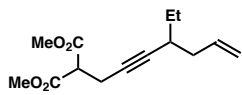

**Dimethyl 2-(4-ethylhept-6-en-2-yn-1-yl)malonate (3h)**

Prepared according to the general procedure. The crude mixture was purified by column chromatography (gradient elution, hexane:ethyl acetate = 20:1 to 15:1) to give the title compound as colorless oil in 83% yield (21 mg).  $^1\text{H}$  NMR (600 MHz,  $\text{CDCl}_3$ )  $\delta$  5.79 – 5.85 (m, 1H), 5.04 (d,  $J = 17.8$  Hz, 1H), 5.01 (d,  $J = 10.0$  Hz, 1H), 3.75 (s, 6H), 3.58 (t,  $J = 7.9$  Hz, 1H), 2.77 (dd,  $J = 7.8, 1.9$  Hz, 2H), 2.23 – 2.26 (m, 1H), 2.11 – 2.18 (m, 2H), 1.42 – 1.49 (m, 1H), 1.30 – 1.38 (m, 1H), 0.94 (t,  $J = 7.3$  Hz, 3H).  $^{13}\text{C}$  NMR (151 MHz,  $\text{CDCl}_3$ )  $\delta$  169.0, 136.5, 116.6, 85.6, 77.3, 53.1, 51.9, 39.4, 33.4, 27.8, 19.3, 11.9. HRMS (ESI $^+$ ):  $m/z$  for  $\text{C}_{14}\text{H}_{21}\text{O}_4$   $[\text{M}+\text{H}]^+$  calcd. 253.1440, found 253.1448.

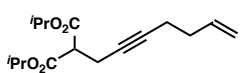

**Diisopropyl 2-(hept-6-en-2-yn-1-yl)malonate (3i)**

Prepared according to the general procedure. The crude mixture was purified by column chromatography (gradient elution, hexane:ethyl acetate = 20:1 to 15:1) to give the title compound as colorless oil in 86% yield (24 mg).  $^1\text{H}$  NMR (600 MHz,  $\text{CDCl}_3$ )  $\delta$  5.79 – 5.86 (m, 1H), 5.02 – 5.09 (m, 3H), 4.99 (d,  $J = 10.3$  Hz, 1H), 3.44 (t,  $J = 7.8$  Hz, 1H), 2.71 (d,  $J = 7.7$  Hz, 2H), 2.19 (*app.* s, 4H), 1.25 (d,  $J = 5.9$  Hz, 6H), 1.24 (d,  $J = 5.8$

Hz, 6H).  $^{13}\text{C}$  NMR (151 MHz,  $\text{CDCl}_3$ )  $\delta$  168.1, 137.4, 115.8, 81.9, 76.5, 69.5, 52.4, 33.3, 22.0, 21.9, 18.9, 18.8. HRMS (ESI<sup>+</sup>):  $m/z$  for  $\text{C}_{16}\text{H}_{25}\text{O}_4$   $[\text{M}+\text{H}]^+$  calcd. 281.1753, found 281.1752.

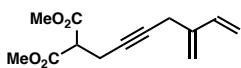

**Dimethyl 2-(5-methylenehept-6-en-2-yn-1-yl)malonate (12)**

Prepared according to the general procedure. The crude mixture was purified (hexane:ethyl acetate = 20:1 to 15:1) to give the title compound as colorless oil in 89% yield (21 mg).  $^1\text{H}$  NMR (500 MHz,  $\text{CDCl}_3$ )  $\delta$  6.42 (dd,  $J = 17.6, 10.9$  Hz, 1H), 5.35 (s, 1H), 5.18 (d,  $J = 17.6$  Hz, 1H), 5.13 (s, 1H), 5.08 (d,  $J = 10.9$  Hz, 1H), 3.76 (s, 6H), 3.60 (t,  $J = 7.7$  Hz, 1H), 3.05 (s, 2H), 2.81 (d,  $J = 7.7$  Hz, 2H).  $^{13}\text{C}$  NMR (126 MHz,  $\text{CDCl}_3$ )  $\delta$  168.9, 141.3, 138.0, 117.5, 113.9, 79.4, 78.9, 53.1, 51.7, 22.0, 19.3. HRMS (ESI<sup>+</sup>):  $m/z$  for  $\text{C}_{13}\text{H}_{16}\text{O}_4\text{Na}$   $[\text{M}+\text{Na}]^+$  calcd. 259.0946, found 259.0948.

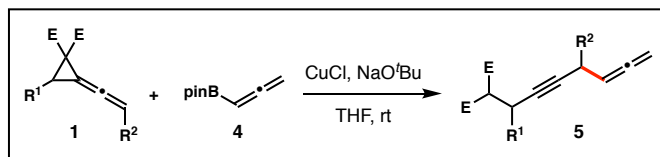

**General procedure for the synthesis of compound 5:** In an Ar-filled glove box, to a reaction vial containing a Teflon-coated magnetic stirring bar were added CuCl (0.01 mmol, 10 mol %), NaO'Bu (0.12 mmol, 1.2 equiv) and THF (0.5 mL). The mixture was stirred for 15 min at ambient temperature. Allenyl boronate 4 (0.11 mmol, 1.1 equiv) was then added and the mixture was stirred for 5 min. Vinylidene cyclopropane 1 (0.1 mmol, 1.0 equiv) was added and the mixture was stirred for 3 – 6 h at ambient temperature. Upon complete consumption of vinylidene cyclopropane 1, the reaction mixture was filtered through a pad of silica gel and the solution was concentrated under reduced pressure. Purification of the crude product was performed by flash column chromatography (gradient elution with hexane and ethyl acetate) to give product 5.

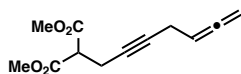

**Dimethyl 2-(hepta-5,6-dien-2-yn-1-yl)malonate (5a)** Prepared according to the general procedure. The crude mixture was purified

by column chromatography (gradient elution, hexane:ethyl acetate = 20:1 to 15:1) to give the title compound as colorless oil in 76% yield (17 mg).  $^1\text{H}$  NMR (500 MHz,  $\text{CDCl}_3$ )  $\delta$  5.05 – 5.10 (m, 1H), 4.76 – 4.78 (m, 2H), 3.76 (s, 6H), 3.57 (t,  $J = 7.7$  Hz, 1H), 2.86 – 2.87 (m, 2H), 2.78 (d,  $J = 7.7$  Hz, 2H).  $^{13}\text{C}$  NMR (126 MHz,  $\text{CDCl}_3$ )  $\delta$  208.8, 168.9, 87.1, 80.0, 77.2, 76.9, 53.1, 51.8, 19.2, 19.1. HRMS (ESI<sup>+</sup>):  $m/z$  for  $\text{C}_{12}\text{H}_{15}\text{O}_4$   $[\text{M}+\text{H}]^+$  calcd. 223.0964, found 223.0970.

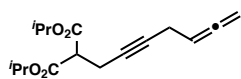

**Diisopropyl 2-(hepta-5,6-dien-2-yn-1-yl)malonate (5b)** Prepared according to the general procedure. The crude mixture was purified

by column chromatography (gradient elution, hexane:ethyl acetate = 20:1 to 15:1) to give the title compound as colorless oil in 90% yield (25 mg).  $^1\text{H}$  NMR (600 MHz,  $\text{CDCl}_3$ )  $\delta$  5.03 – 5.09 (m, 3H), 4.75 – 4.77 (m, 2H), 3.45 (t,  $J = 7.8$  Hz, 1H), 2.85 – 2.87 (m, 2H), 2.73 – 2.74 (m, 2H), 1.25 (d,  $J = 5.9$  Hz, 6H), 1.24 (d,  $J = 5.8$  Hz, 6H).  $^{13}\text{C}$  NMR (151 MHz,  $\text{CDCl}_3$ )  $\delta$  208.7, 168.1, 87.1, 79.6, 77.4, 76.9, 69.5, 52.2, 22.0, 21.9, 19.1, 19.0. HRMS (ESI $^+$ ):  $m/z$  for  $\text{C}_{16}\text{H}_{22}\text{O}_4\text{Na}$   $[\text{M}+\text{Na}]^+$  calcd. 301.1416, found 301.1421.

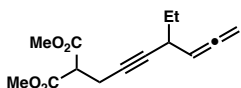

**Dimethyl 2-(4-ethylhepta-5,6-dien-2-yn-1-yl)malonate (5c)**

Prepared according to the general procedure. The crude mixture was purified by column chromatography (gradient elution, hexane:ethyl acetate = 20:1 to 15:1) to give the title compound as colorless oil in 80% yield (20 mg).  $^1\text{H}$  NMR (600 MHz,  $\text{CDCl}_3$ )  $\delta$  5.05 – 5.08 (m, 1H), 4.78 (d,  $J = 2.0$  Hz, 1H), 4.77 (d,  $J = 2.0$  Hz, 1H), 3.76 (s, 6H), 3.58 (t,  $J = 7.8$  Hz, 1H), 2.90 – 2.94 (m, 1H), 2.79 (dd,  $J = 7.8, 1.7$  Hz, 2H), 1.46 – 1.59 (m, 2H), 0.96 (t,  $J = 7.3$  Hz, 3H).  $^{13}\text{C}$  NMR (151 MHz,  $\text{CDCl}_3$ )  $\delta$  207.9, 168.9, 92.3, 83.8, 77.8, 77.1, 53.1, 51.8, 33.1, 28.9, 19.3, 11.7. HRMS (ESI $^+$ ):  $m/z$  for  $\text{C}_{14}\text{H}_{19}\text{O}_4$   $[\text{M}+\text{H}]^+$  calcd. 251.1283, found 251.1277.

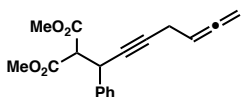

**Dimethyl 2-(1-phenylhepta-5,6-dien-2-yn-1-yl)malonate (5d)**

Prepared according to the general procedure. The crude mixture was purified by column chromatography (gradient elution, hexane:ethyl acetate = 20:1 to 15:1) to give the title compound as colorless oil in 74% yield (22 mg).  $^1\text{H}$  NMR (500 MHz, Acetone- $d_6$ )  $\delta$  7.42 (d,  $J = 7.7$  Hz, 2H), 7.32 (dd,  $J = 7.4, 7.4$  Hz, 2H), 7.26 (dd,  $J = 7.2, 7.2$  Hz, 1H), 5.12 – 5.17 (m, 1H), 4.79 – 4.81 (m, 2H), 4.33 (d,  $J = 10.4$  Hz, 1H), 3.78 (d,  $J = 10.4$  Hz, 1H), 3.74 (s, 3H), 3.48 (s, 3H), 2.91 – 2.93 (m, 2H).  $^{13}\text{C}$  NMR (126 MHz, Acetone- $d_6$ )  $\delta$  209.4, 168.0, 167.6, 139.6, 129.3, 129.2, 128.4, 87.4, 82.2, 81.0, 76.9, 60.1, 52.9, 52.7, 38.6, 19.0. HRMS (ESI $^+$ ):  $m/z$  for  $\text{C}_{18}\text{H}_{18}\text{O}_4\text{Na}$   $[\text{M}+\text{Na}]^+$  calcd. 321.1103, found 321.1117.

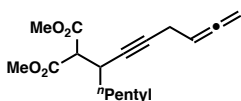

**Dimethyl 2-(dodeca-10,11-dien-7-yn-6-yl)malonate (5e)** Prepared according to the general procedure. The crude mixture was purified

by column chromatography (gradient elution, hexane:ethyl acetate = 20:1 to 15:1) to give the title compound as colorless oil in 86% yield (25 mg).  $^1\text{H}$  NMR (500 MHz, Acetone- $d_6$ )  $\delta$  5.10 – 5.15 (m, 1H), 4.78 – 4.80 (m, 2H), 3.70 (s, 6H), 3.45 (d,  $J = 9.5$  Hz, 1H), 3.04 – 3.07 (m, 1H), 2.87 – 2.89 (m, 2H), 1.55 – 1.61 (m, 1H), 1.48 –

1.52 (m, 1H), 1.38 – 1.45 (m, 2H), 1.25 – 1.31 (m, 4H), 0.89 (t,  $J = 6.4$  Hz, 3H).  $^{13}\text{C}$  NMR (126 MHz, Acetone- $d_6$ )  $\delta$  209.3, 168.6, 168.5, 87.7, 81.4, 81.1, 76.8, 57.4, 52.7, 52.6, 33.4, 32.7, 32.1, 27.5, 23.2, 19.0, 14.3. HRMS (ESI $^+$ ):  $m/z$  for  $\text{C}_{17}\text{H}_{25}\text{O}_4$   $[\text{M}+\text{H}]^+$  calcd. 293.1753, found 293.1751.

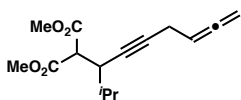

**Dimethyl 2-(2-methylnona-7,8-dien-4-yn-3-yl)malonate (5f)**

Prepared according to the general procedure. The crude mixture was purified by column chromatography (gradient elution, hexane:ethyl acetate = 20:1 to 15:1) to give the title compound as colorless oil in 83% yield (22 mg).  $^1\text{H}$  NMR (500 MHz, Acetone- $d_6$ )  $\delta$  5.11 – 5.16 (m, 1H), 4.79 – 4.81 (m, 2H), 3.70 (s, 6H), 3.50 (d,  $J = 10.8$  Hz, 1H), 3.08 (dd,  $J = 10.8, 1.4$  Hz, 1H), 2.90 – 2.91 (m, 2H), 1.71 – 1.77 (m, 1H), 1.01 (d,  $J = 6.6$  Hz, 3H), 0.93 (d,  $J = 6.6$  Hz, 3H).  $^{13}\text{C}$  NMR (126 MHz, Acetone- $d_6$ )  $\delta$  209.4, 168.6, 168.5, 87.7, 82.4, 78.8, 76.9, 55.8, 52.9, 52.7, 39.5, 29.5, 22.1, 19.0, 17.0. HRMS (ESI $^+$ ):  $m/z$  for  $\text{C}_{15}\text{H}_{21}\text{O}_4$   $[\text{M}+\text{H}]^+$  calcd. 265.1440, found 265.1446.

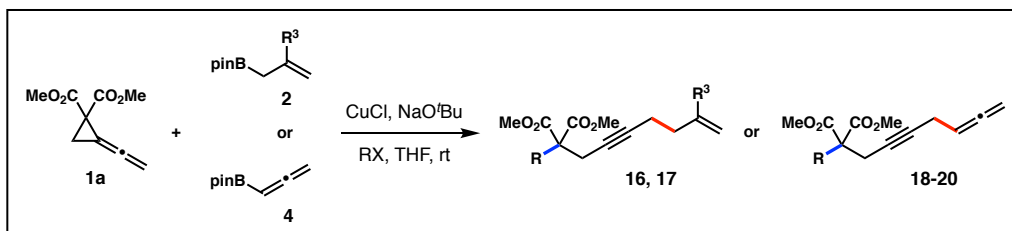

**General procedure for the three-component reactions:** In an Ar-filled glove box, to a reaction vial containing a Teflon-coated magnetic stirring bar were added CuCl (0.01 mmol, 10 mol %), NaO $^t$ Bu (0.12 mmol, 1.2 equiv) and THF (0.5 mL), the resulting mixture was stirred for 15 min at ambient temperature. Allylboronate **2** or allenylboronate **4** (0.11 mmol, 1.1 equiv) was added and the mixture was stirred for 5 min. Then vinylidene cyclopropane **1a** (0.1 mmol, 1.0 equiv) and the trapping agent RX (0.2 mmol, 2.0 equiv) were added sequentially. The mixture was stirred for 3 – 6 h at ambient temperature. Upon complete consumption of vinylidene cyclopropane **1a**, the reaction mixture was filtered through a pad of silica gel and the solution was concentrated under reduced pressure. Purification of the crude product was performed by flash column chromatography (gradient elution with hexane and ethyl acetate) to give product as colorless oil.



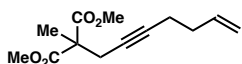

**Dimethyl 2-(hept-6-en-2-yn-1-yl)-2-methylmalonate (16)**

Prepared according to the general procedure from **1a** and **2a** with iodomethane as the trapping agent. The crude mixture was purified by column chromatography (gradient elution, hexane:ethyl acetate = 20:1 to 15:1) to give compound **16** as colorless oil in 84% yield (20 mg). <sup>1</sup>H NMR (500 MHz, CDCl<sub>3</sub>) δ 5.79 – 5.86 (m, 1H), 5.05 (d, *J* = 17.1 Hz, 1H), 5.01 (d, *J* = 10.1 Hz, 1H), 3.73 (s, 6H), 2.75 (s, 2H), 2.21 (*app.* s, 4H), 1.53 (s, 3H). <sup>13</sup>C NMR (126 MHz, CDCl<sub>3</sub>) δ 172.0, 137.3, 115.9, 83.1, 75.5, 53.9, 53.1, 33.4, 26.6, 20.3, 18.9. HRMS (ESI<sup>+</sup>): *m/z* for C<sub>13</sub>H<sub>19</sub>O<sub>4</sub> [M+H]<sup>+</sup> calcd. 239.1283, found 239.1277.

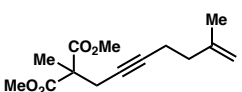

**Dimethyl 2-methyl-2-(6-methylhept-6-en-2-yn-1-yl)malonate (17)**

Prepared according to the general procedure from **1a** and **2e** with iodomethane as the trapping agent. The crude mixture was purified by column chromatography (gradient elution, hexane:ethyl acetate = 20:1 to 15:1) to give compound **17** as colorless oil in 71% yield (18 mg). <sup>1</sup>H NMR (500 MHz, CDCl<sub>3</sub>) δ 4.74 (s, 1H), 4.70 (s, 1H), 3.73 (s, 6H), 2.75 (s, 2H), 2.26 (t, *J* = 7.2 Hz, 2H), 2.16 (t, *J* = 7.3 Hz, 2H), 1.71 (s, 3H), 1.52 (s, 3H). <sup>13</sup>C NMR (126 MHz, CDCl<sub>3</sub>) δ 172.0, 144.5, 111.1, 83.3, 75.3, 53.9, 53.0, 37.3, 26.6, 22.6, 20.2, 17.7. HRMS (ESI<sup>+</sup>): *m/z* for C<sub>14</sub>H<sub>21</sub>O<sub>4</sub> [M+H]<sup>+</sup> calcd. 253.1440, found 253.1443.

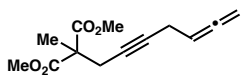

**Dimethyl 2-(hepta-5,6-dien-2-yn-1-yl)-2-methylmalonate (18)**

Prepared according to the general procedure from **1a** and **4** with iodomethane as the trapping agent. The crude mixture was purified by column chromatography (gradient elution, hexane:ethyl acetate = 20:1 to 15:1) to give compound **18** as colorless oil in 85% yield (20 mg). <sup>1</sup>H NMR (500 MHz, CDCl<sub>3</sub>) δ 5.08 – 5.13 (m, 1H), 4.78 – 4.81 (m, 2H), 3.76 (s, 6H), 2.89 – 2.91 (m, 2H), 2.80 (s, 2H), 1.56 (s, 3H). <sup>13</sup>C NMR (126 MHz, CDCl<sub>3</sub>) δ 208.9, 171.9, 87.2, 80.8, 77.0, 76.3, 53.8, 53.1, 26.6, 20.3, 19.1. HRMS (ESI<sup>+</sup>): *m/z* for C<sub>13</sub>H<sub>16</sub>O<sub>4</sub>Na [M+Na]<sup>+</sup> calcd. 259.0946, found 259.0942.

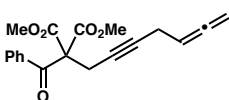

**Dimethyl 2-benzoyl-2-(hepta-5,6-dien-2-yn-1-yl)malonate (19)**

Prepared according to the general procedure from **1a** and **4** with benzoyl fluoride as the trapping agent. The crude mixture was purified by column chromatography (gradient elution, hexane:ethyl acetate = 15:1 to 10:1) to give compound **19** as colorless oil in 67% yield (22 mg). <sup>1</sup>H NMR (500 MHz, Acetone-*d*<sub>6</sub>) δ 7.86 (d, *J* = 7.9 Hz, 2H), 7.63 (dd, *J* = 7.4, 7.4 Hz, 1H), 7.51 (dd, *J* = 7.6, 7.6 Hz, 2H), 5.00 – 5.05 (m, 1H), 4.73 – 4.75 (m, 2H), 3.74 (s, 6H), 3.11 (s, 2H), 2.78 –

2.82 (m, 2H).  $^{13}\text{C}$  NMR (126 MHz, Acetone- $d_6$ )  $\delta$  209.3, 191.8, 168.1, 136.6, 134.0, 129.7, 129.4, 87.4, 81.1, 76.7, 76.6, 69.4, 53.4, 25.3, 19.1. HRMS (ESI $^+$ ): m/z for  $\text{C}_{19}\text{H}_{18}\text{O}_5\text{Na}$   $[\text{M}+\text{Na}]^+$  calcd. 349.1052, found 349.1055.

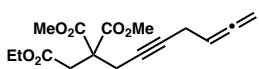

**Ethyl 2,2-dimethyl nona-7,8-dien-4-yne-1,2,2-tricarboxylate (20)**

Prepared according to the general procedure from **1a** and **4** with ethyl bromoacetate as the trapping agent. The crude mixture was purified by column chromatography (gradient elution, hexane:ethyl acetate = 15:1 to 10:1) to give compound **20** as colorless oil in 75% yield (23 mg).  $^1\text{H}$  NMR (500 MHz, Acetone- $d_6$ )  $\delta$  5.10 – 5.15 (m, 1H), 4.79 – 4.82 (m, 2H), 4.10 (q,  $J = 7.1$  Hz, 2H), 3.70 (s, 6H), 3.12 (s, 2H), 2.94 (s, 2H), 2.87 – 2.89 (m, 2H), 1.21 (t,  $J = 7.1$  Hz, 3H).  $^{13}\text{C}$  NMR (126 MHz, Acetone- $d_6$ )  $\delta$  209.4, 170.7, 169.9, 87.5, 81.6, 77.0, 76.5, 61.2, 55.8, 53.3, 37.5, 24.4, 18.9, 14.4. HRMS (ESI $^+$ ): m/z for  $\text{C}_{16}\text{H}_{21}\text{O}_6$   $[\text{M}+\text{H}]^+$  calcd. 309.1338, found 309.1335.

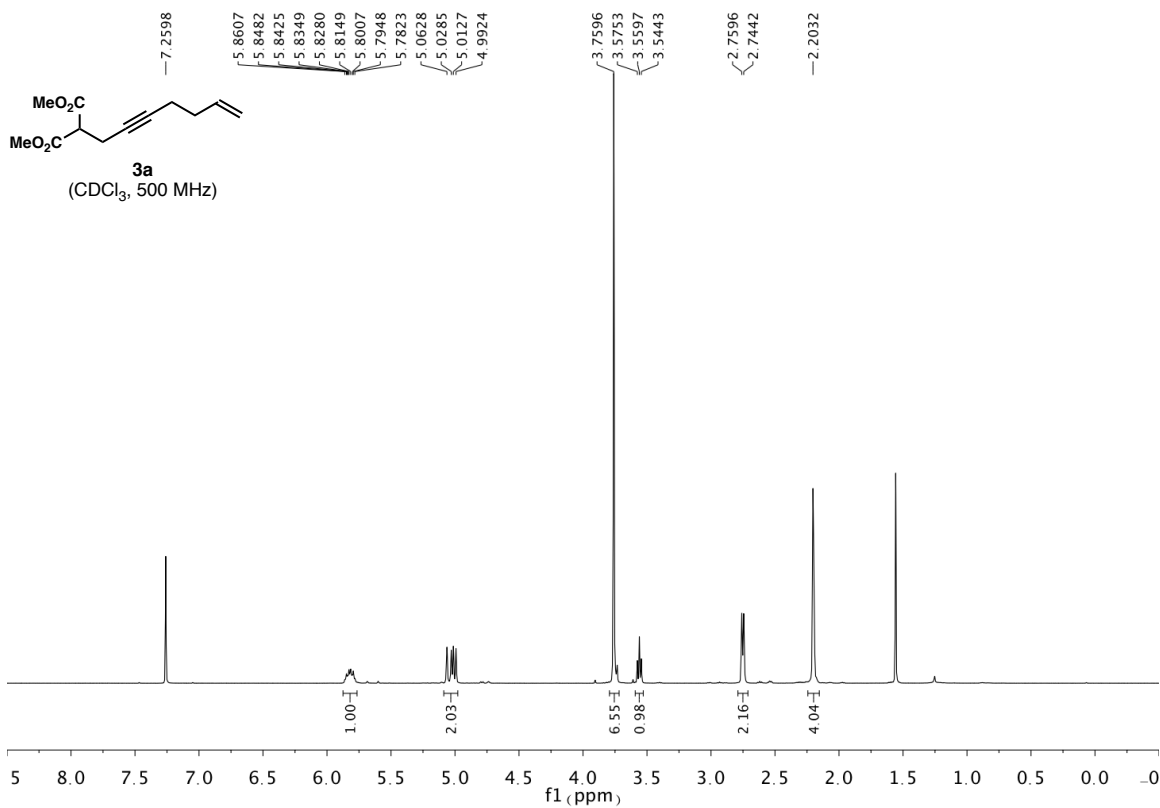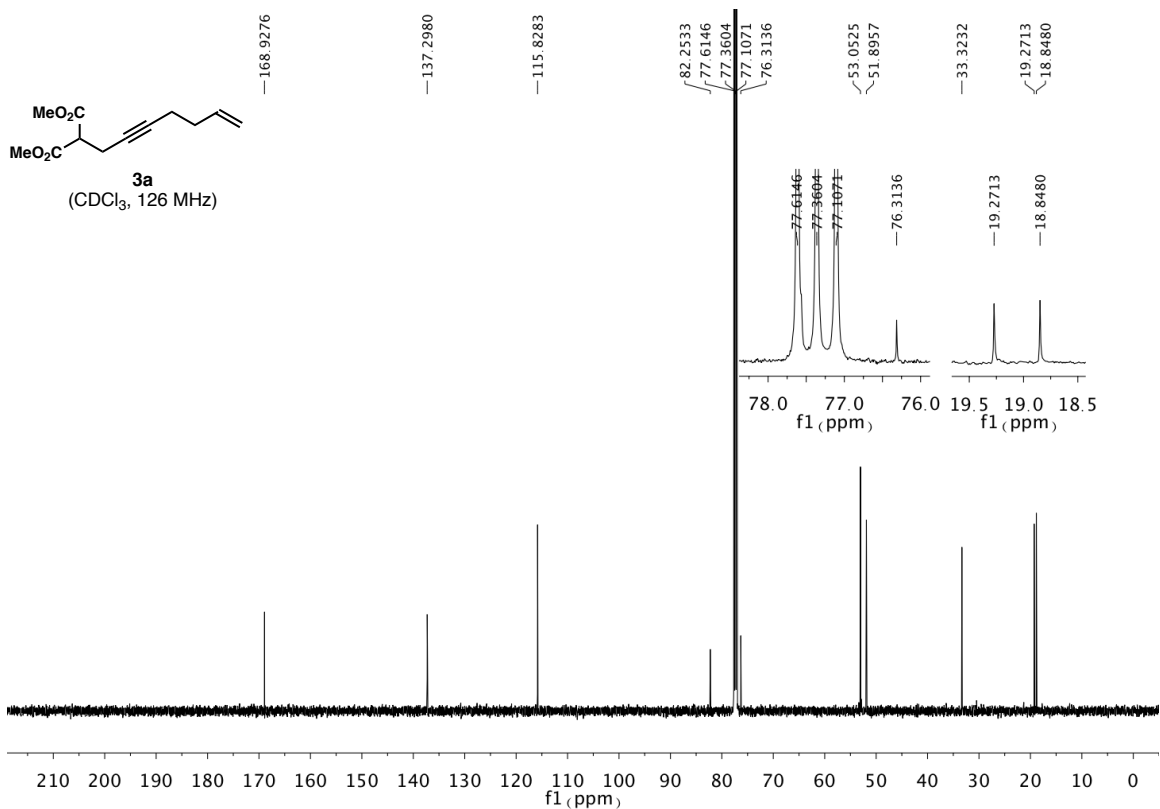

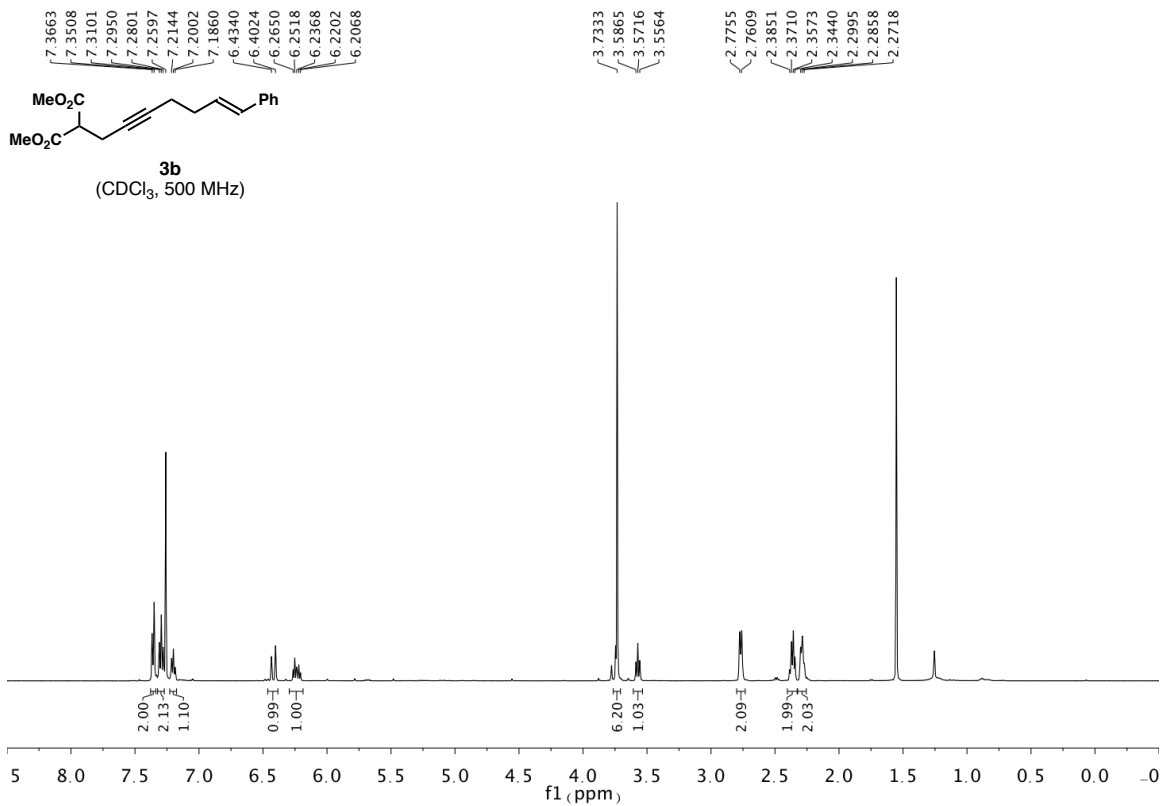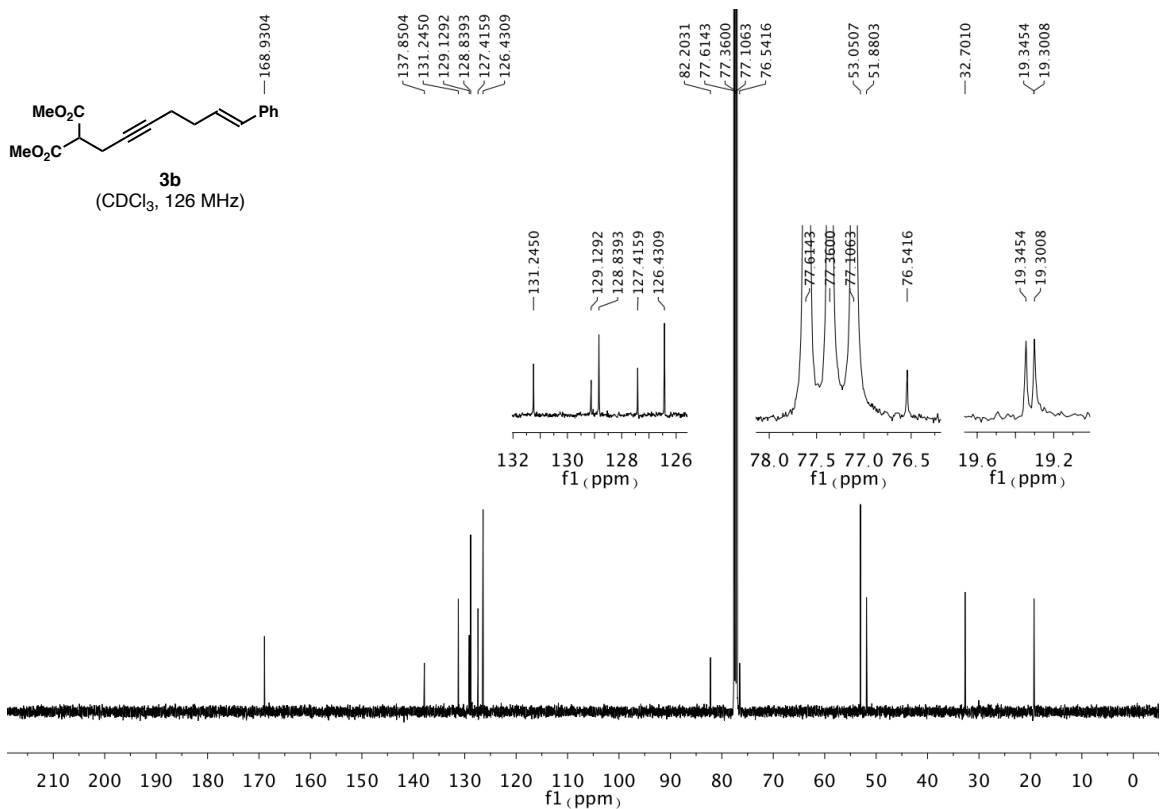

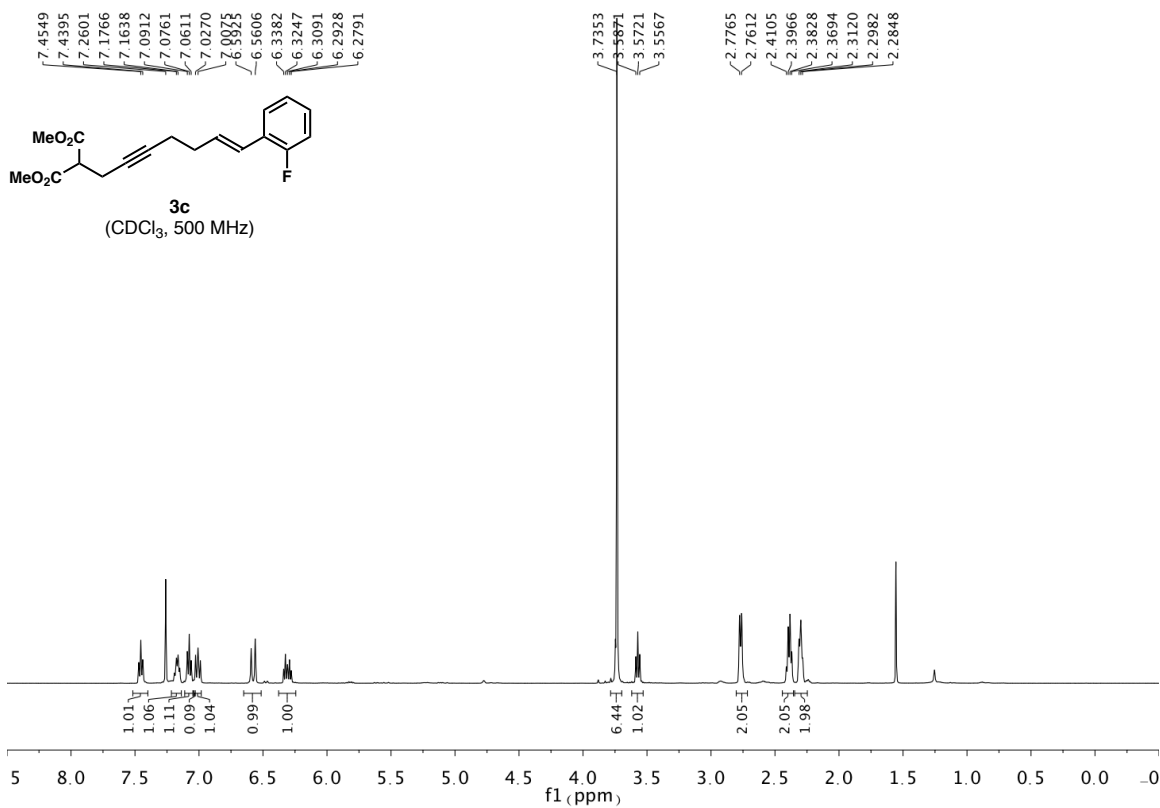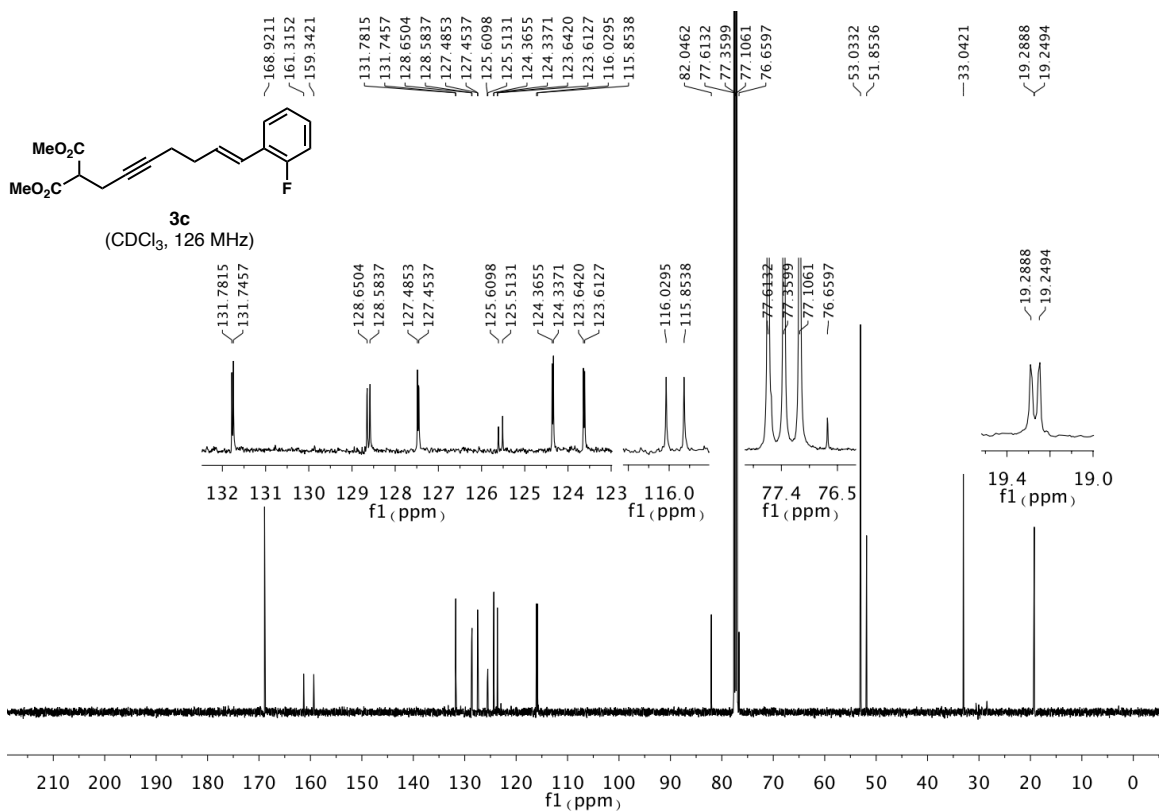

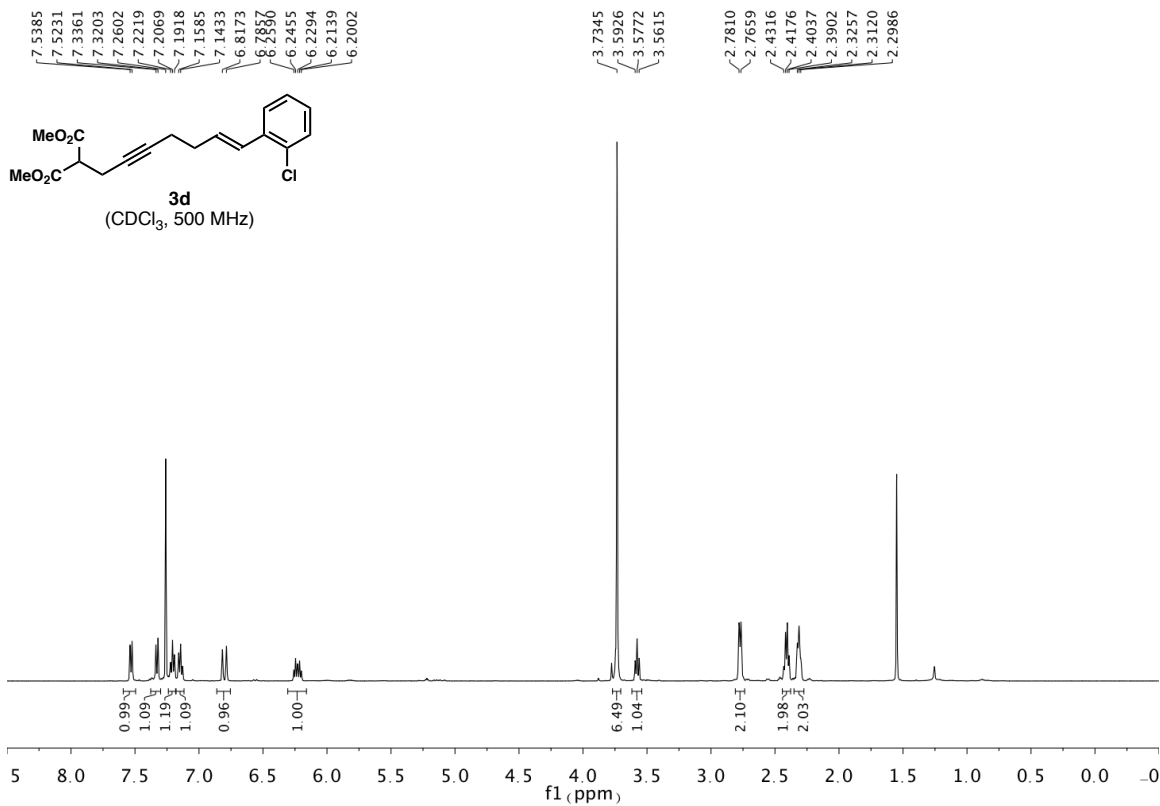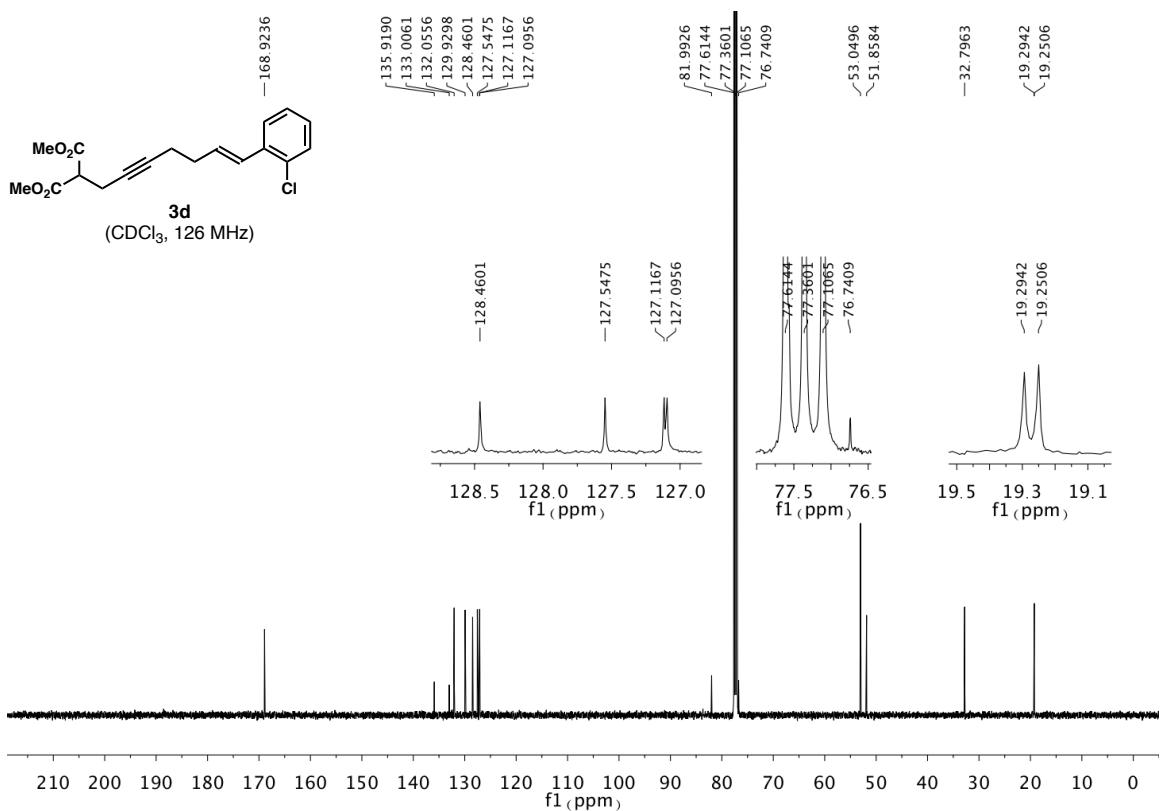

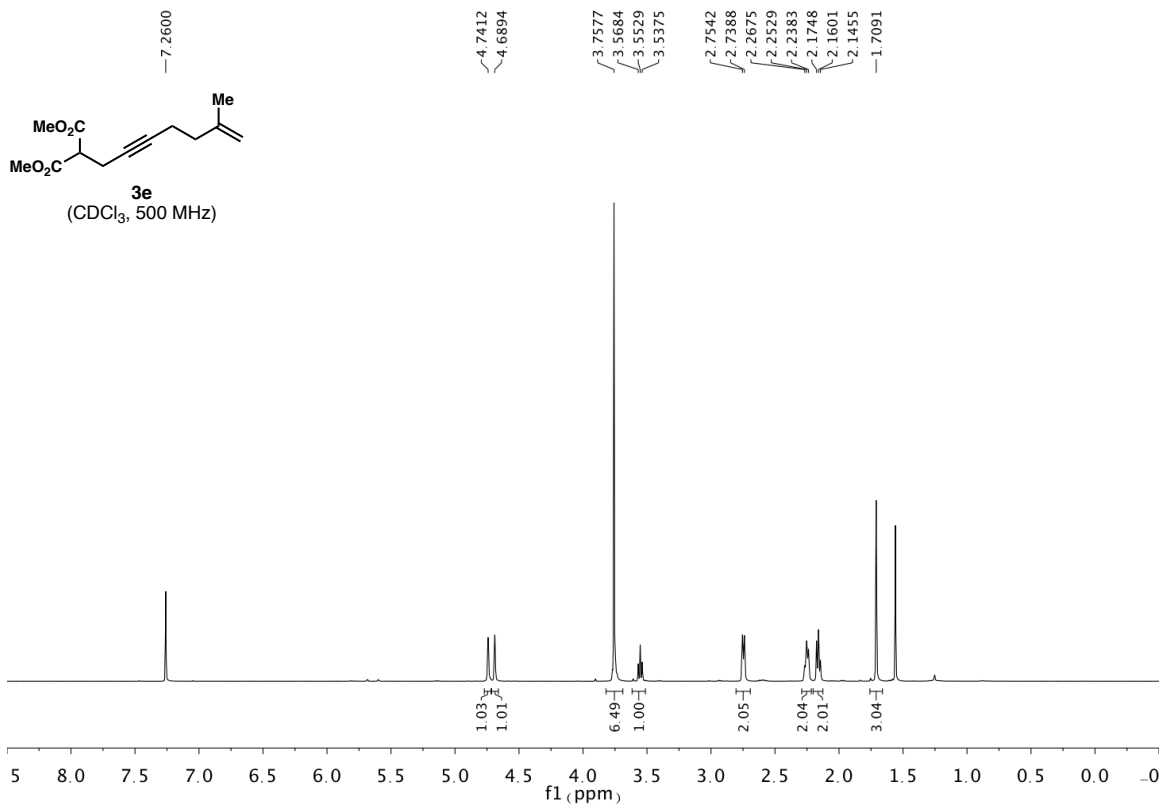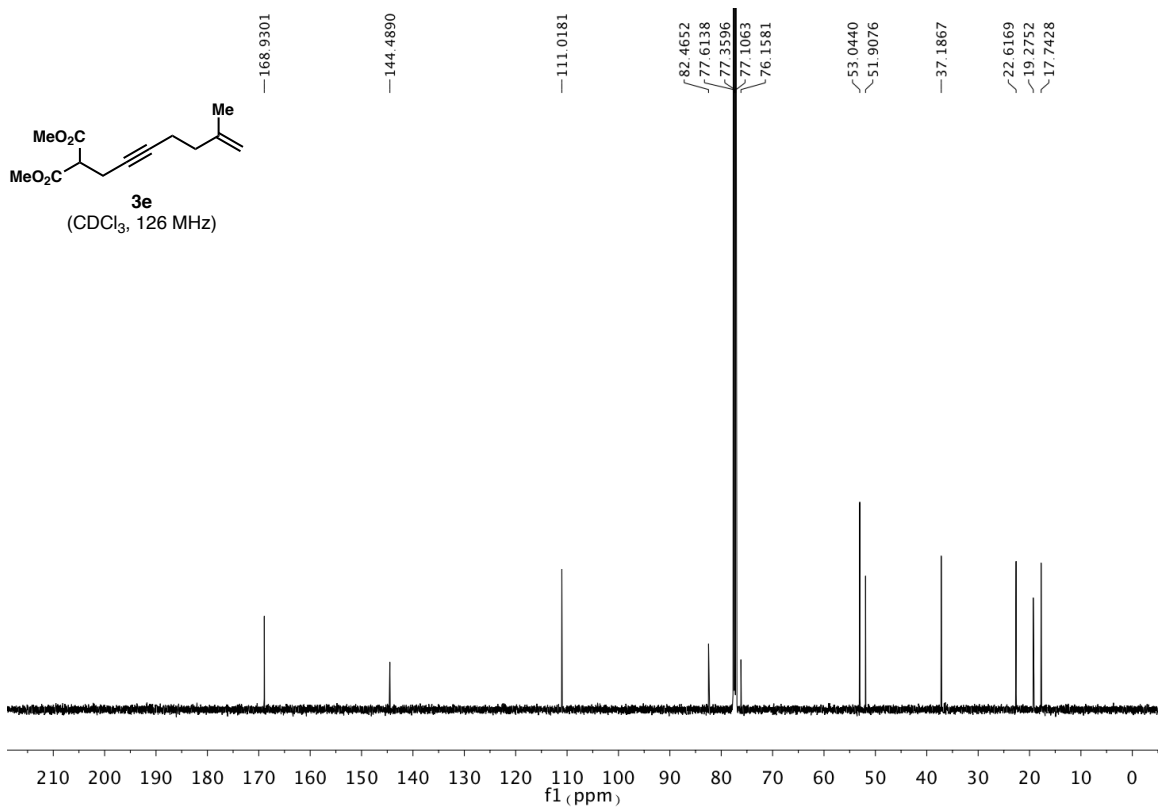

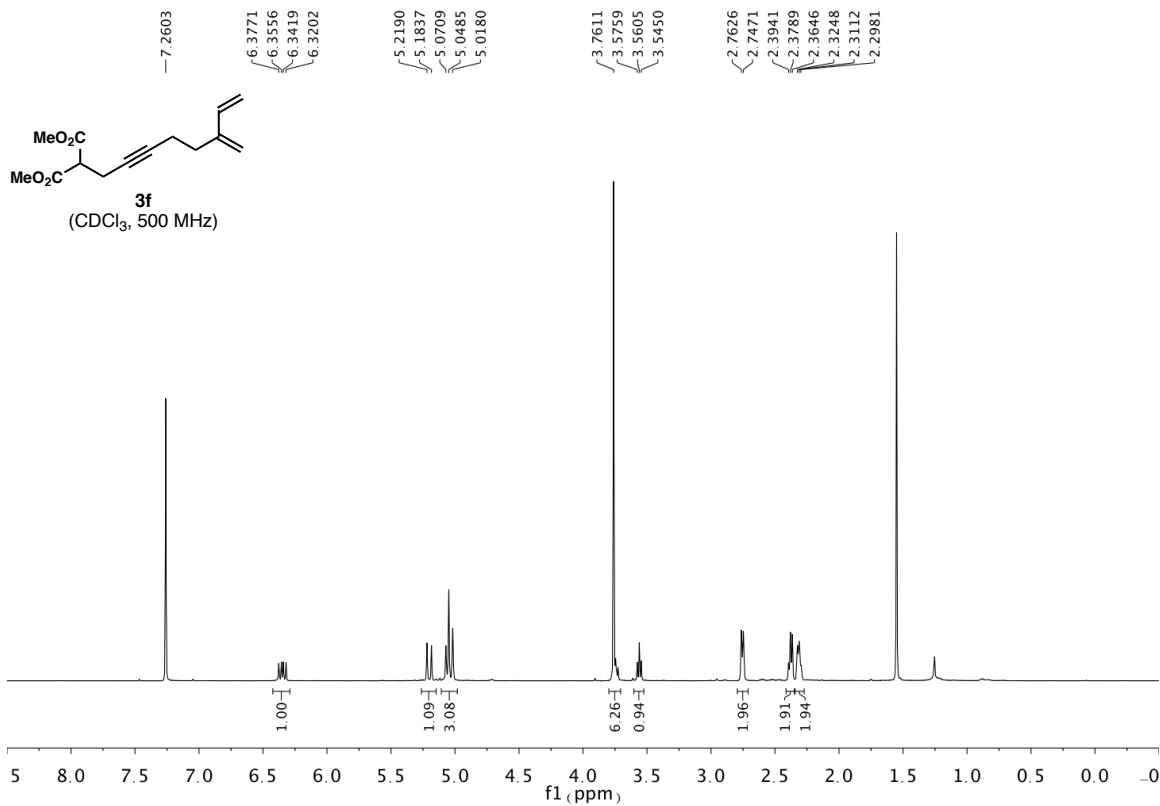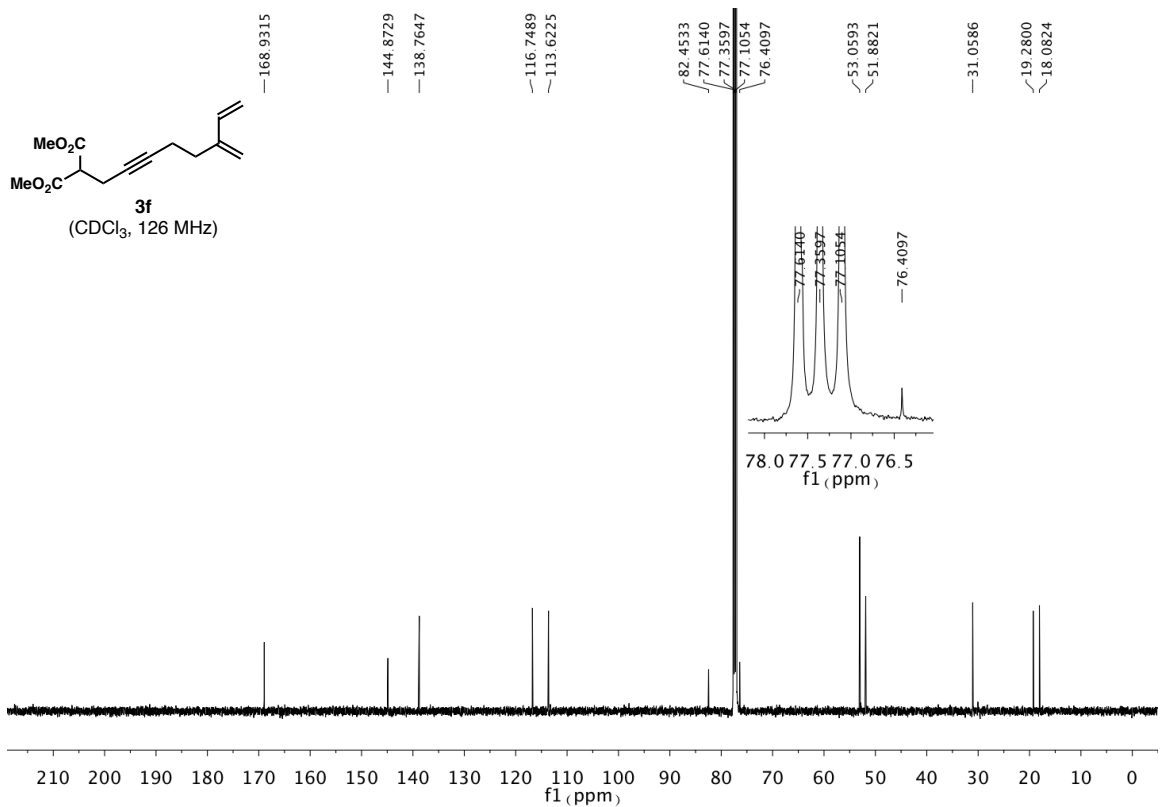



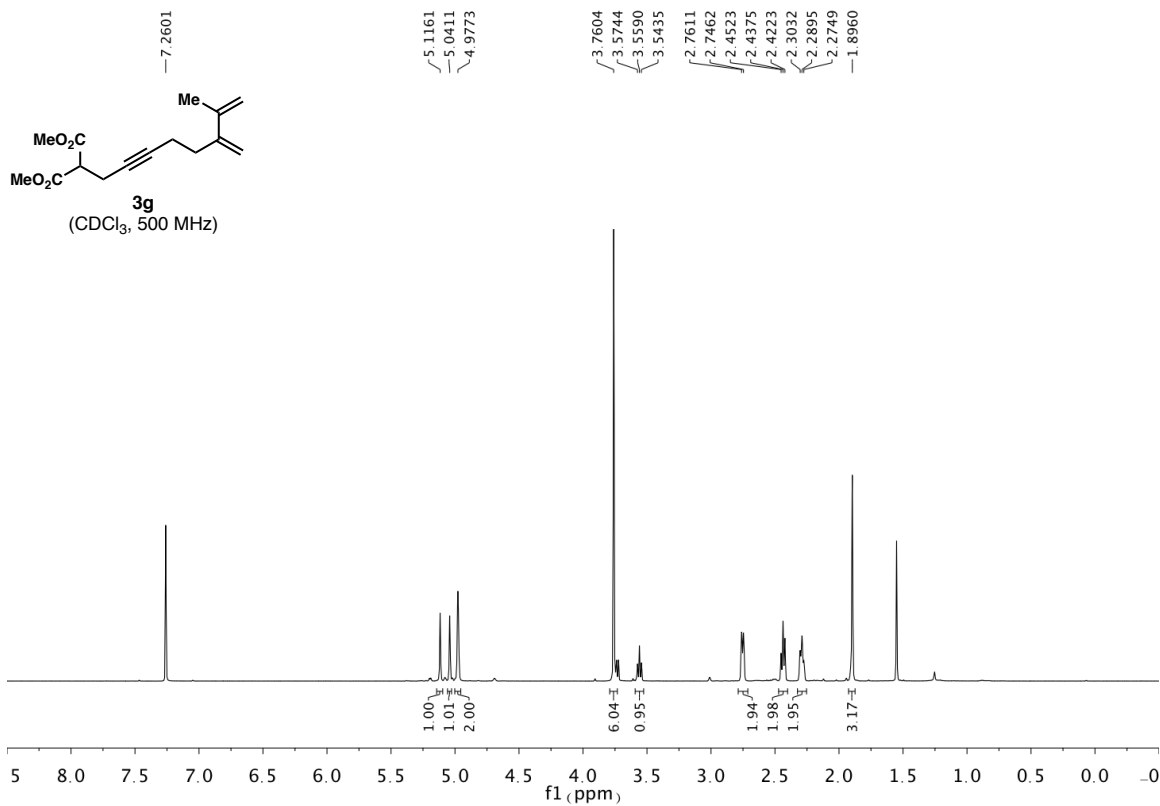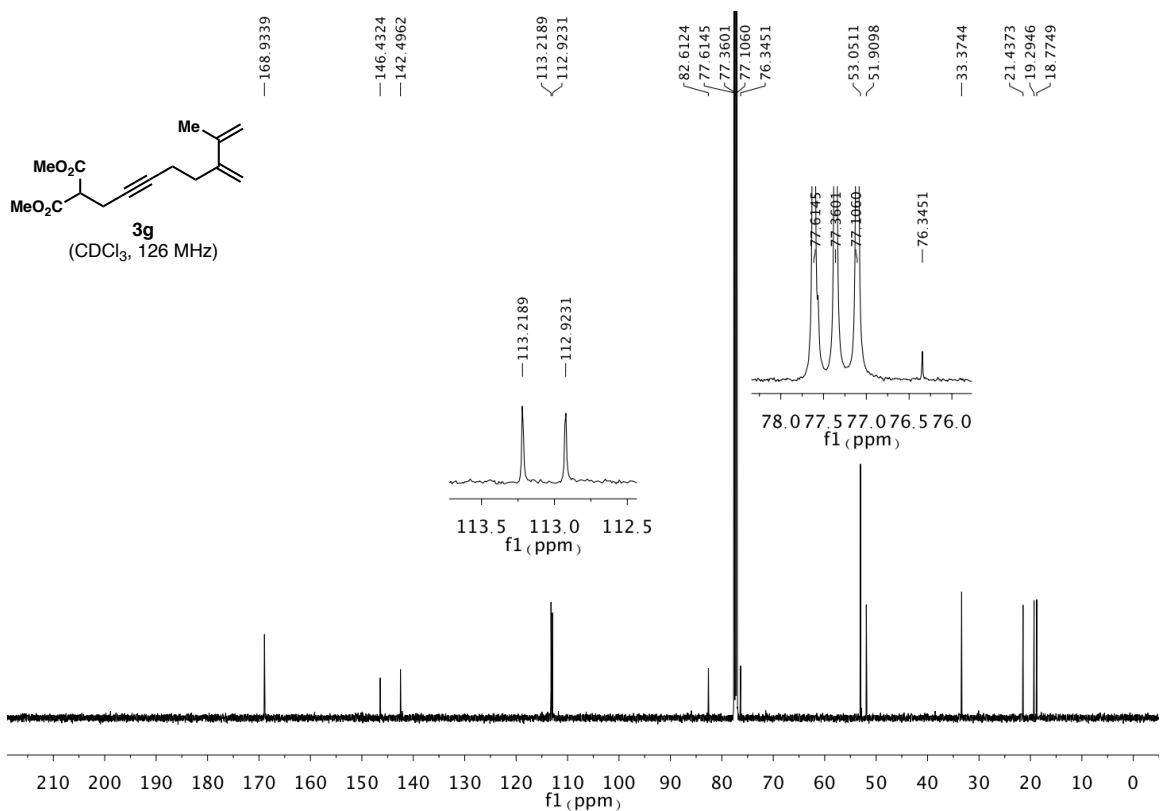

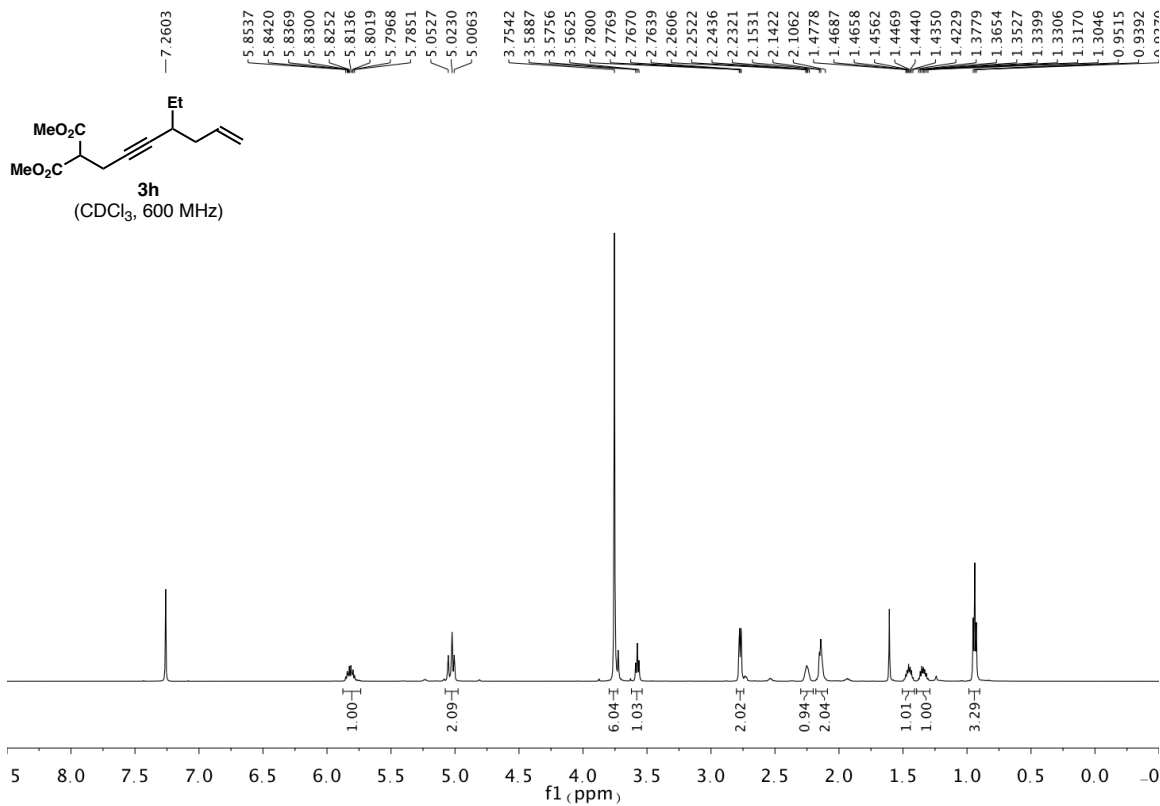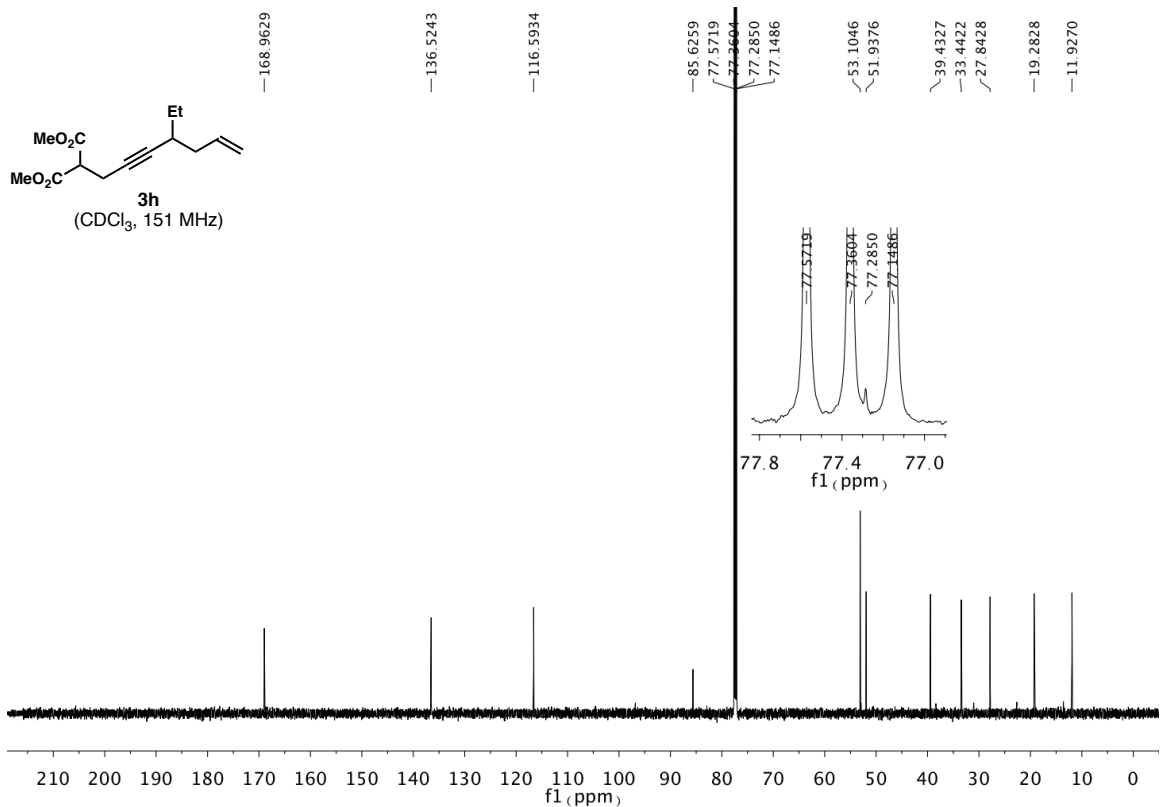

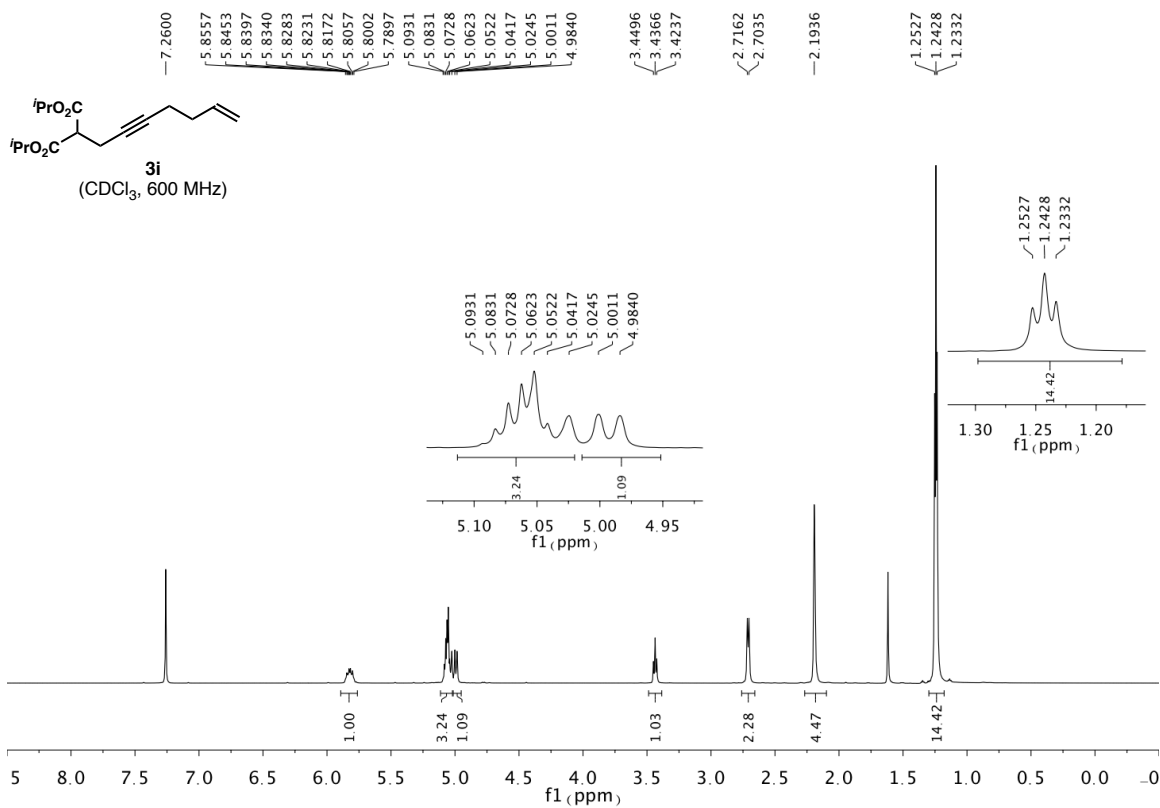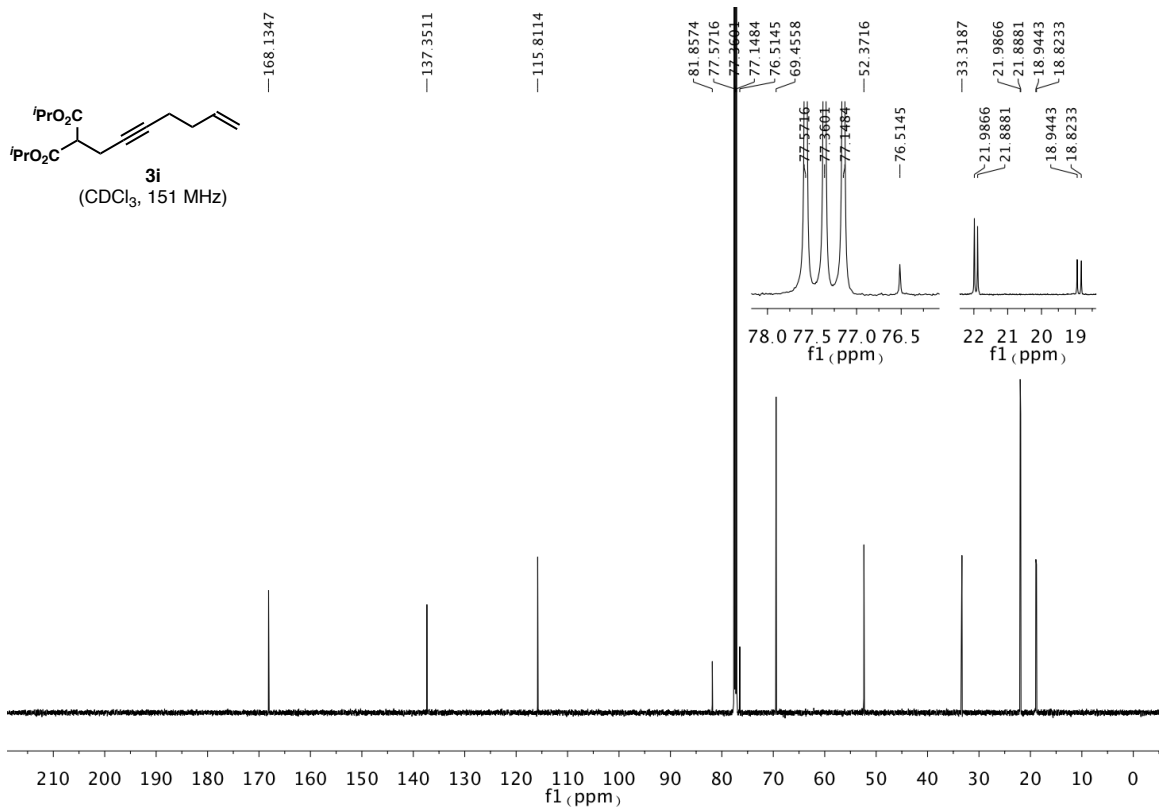

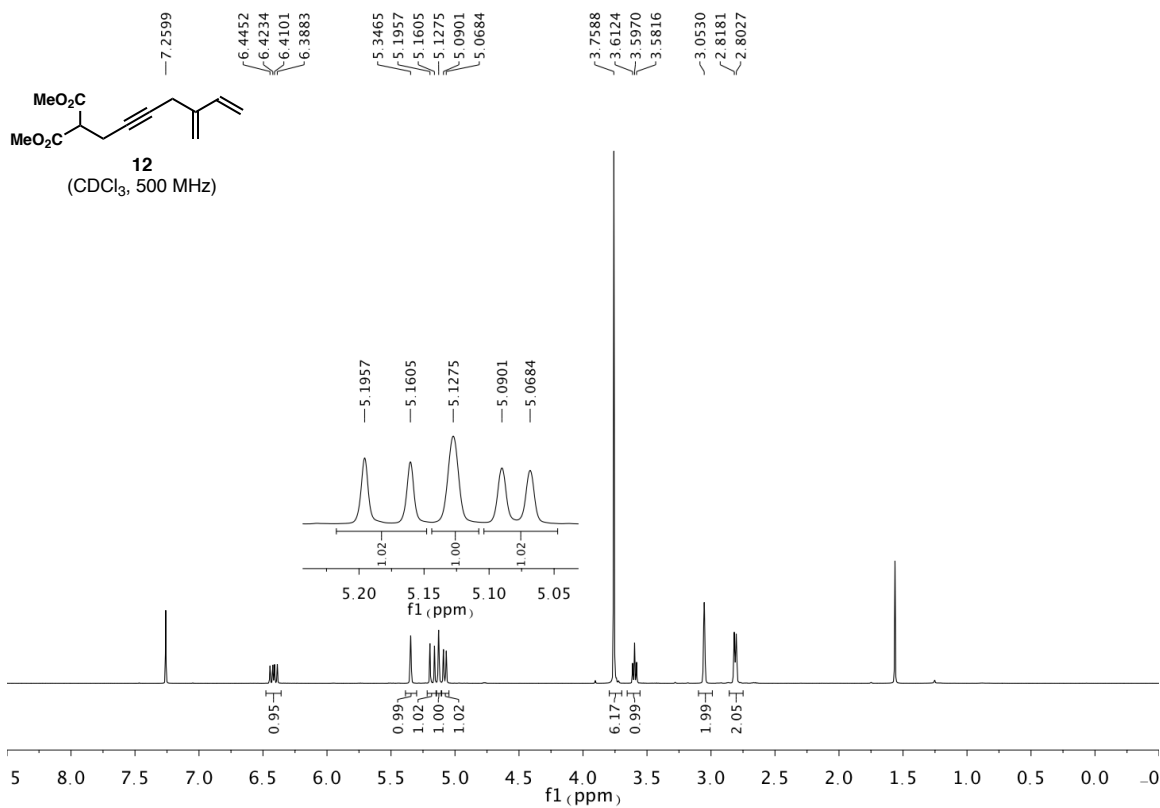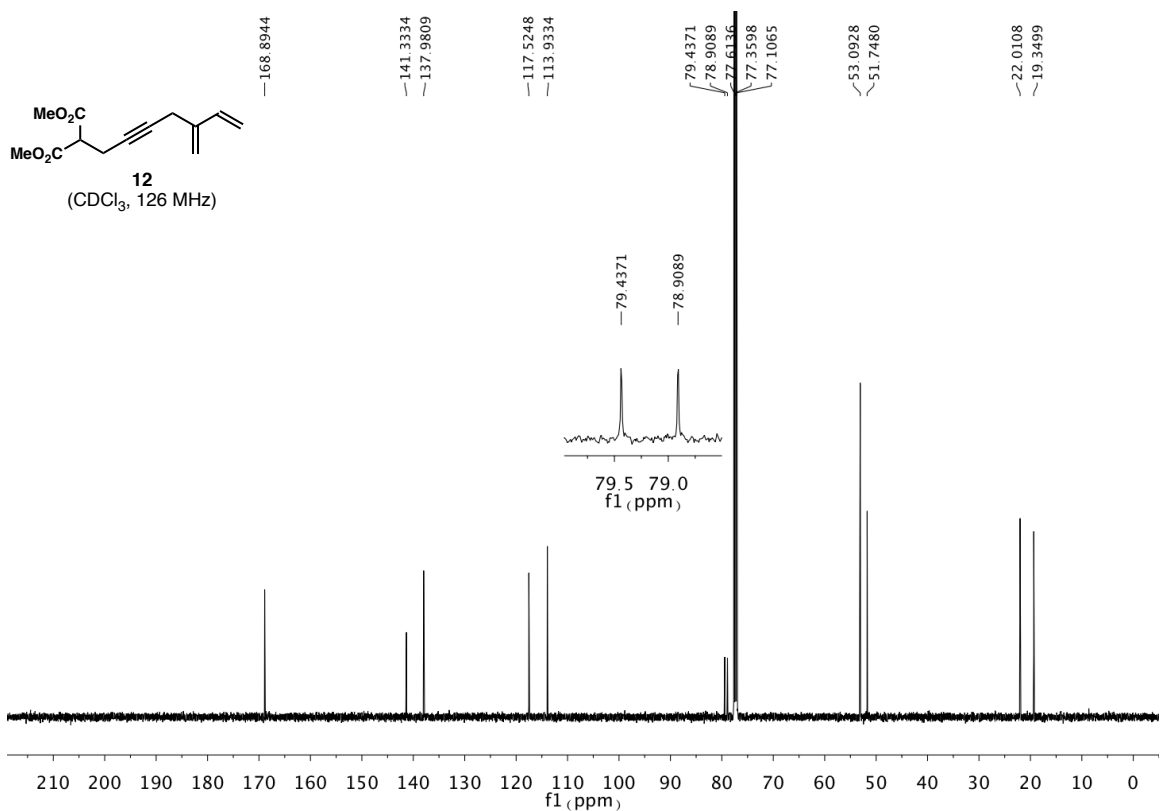

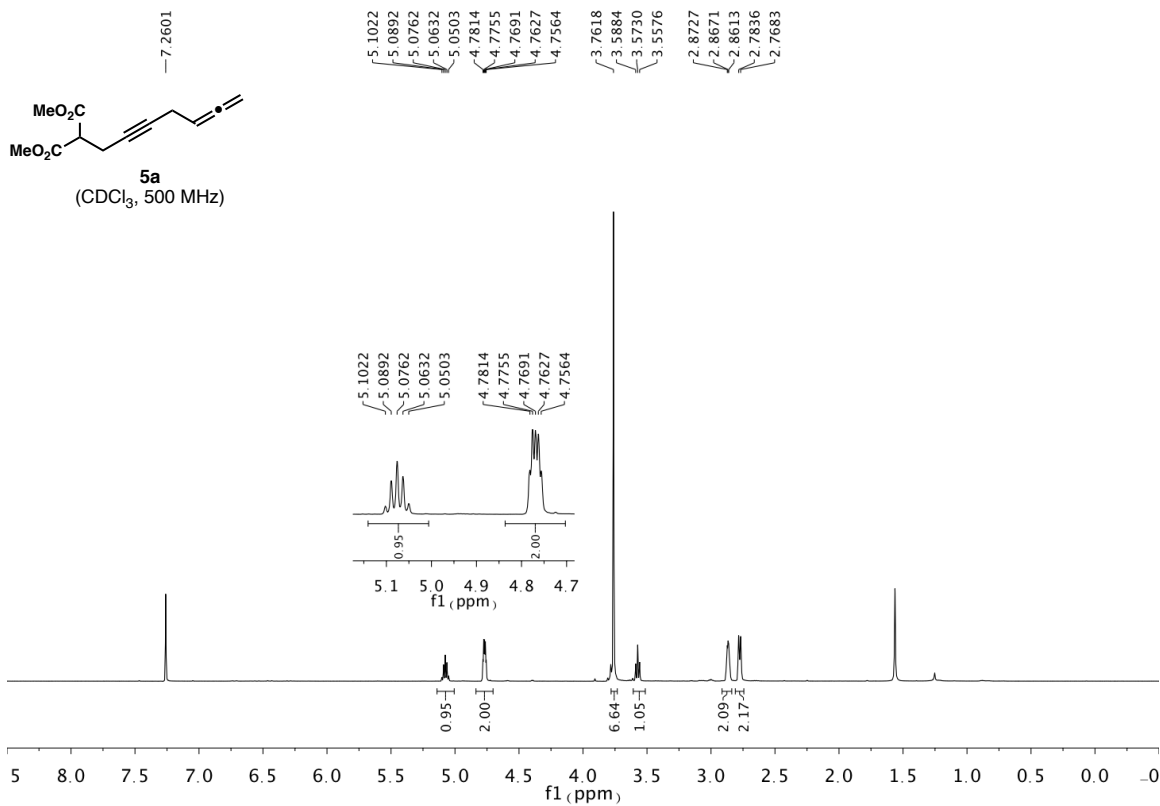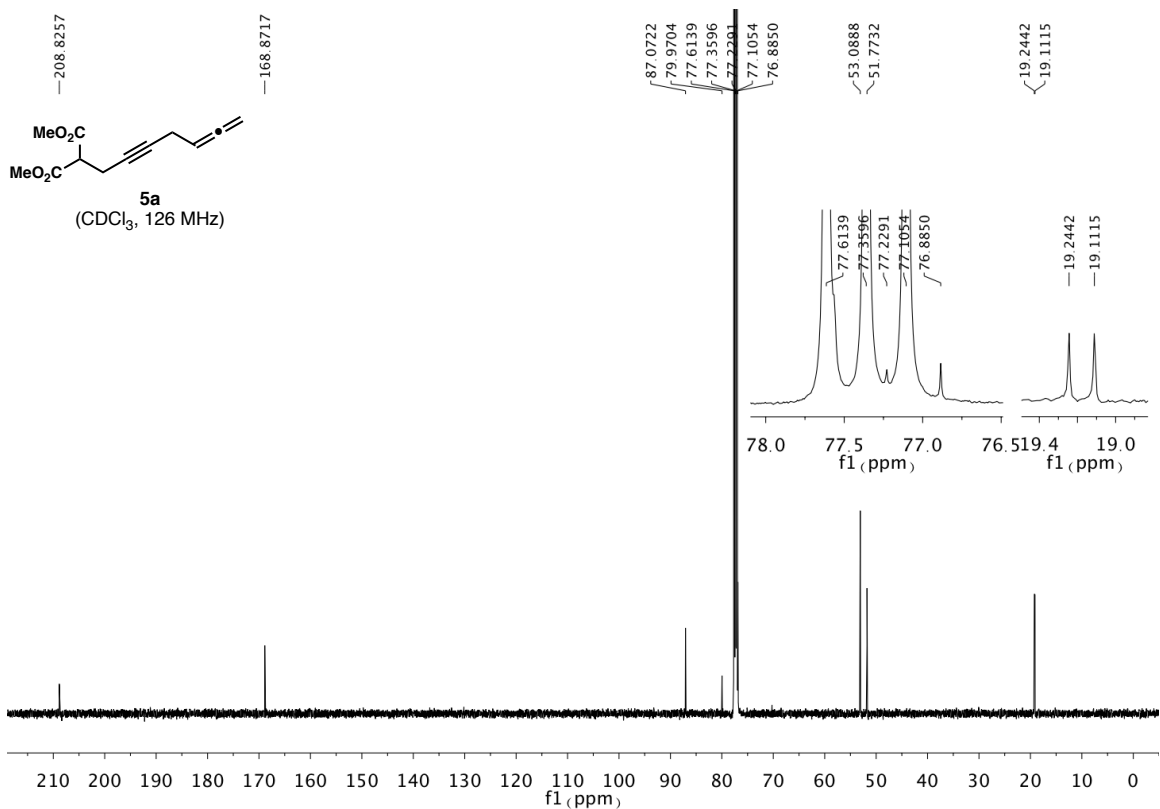

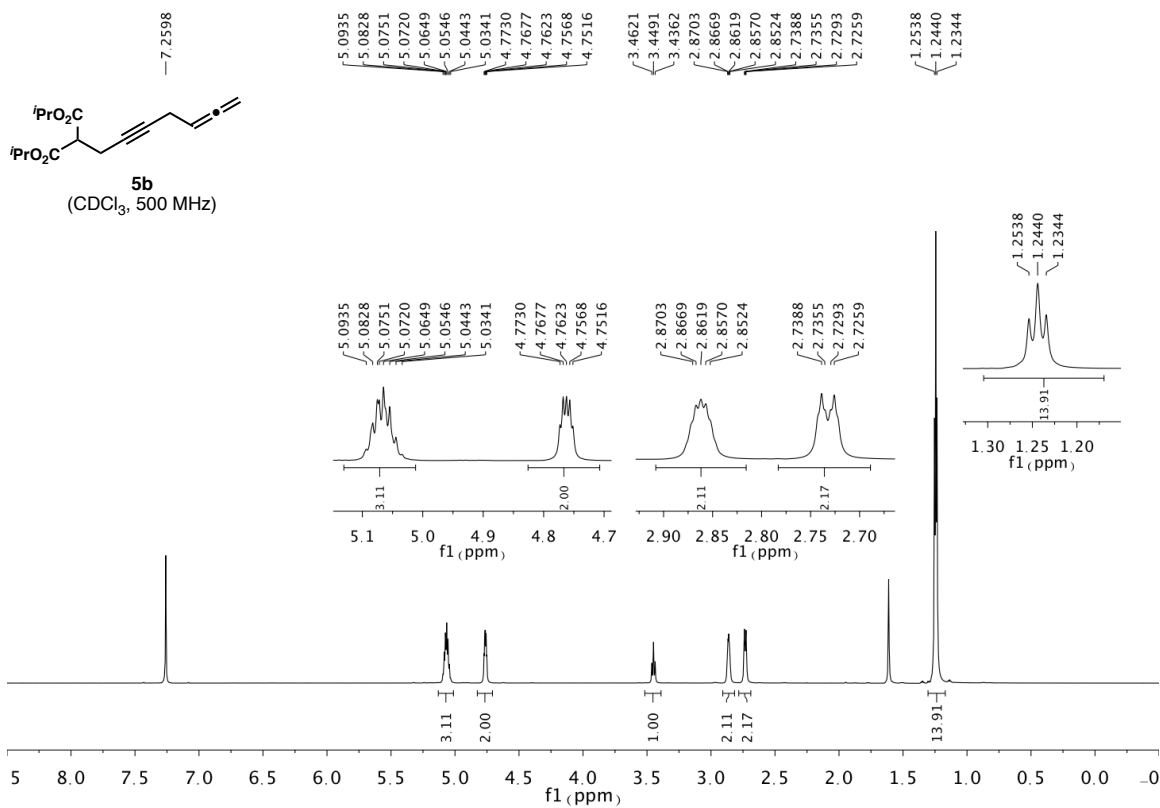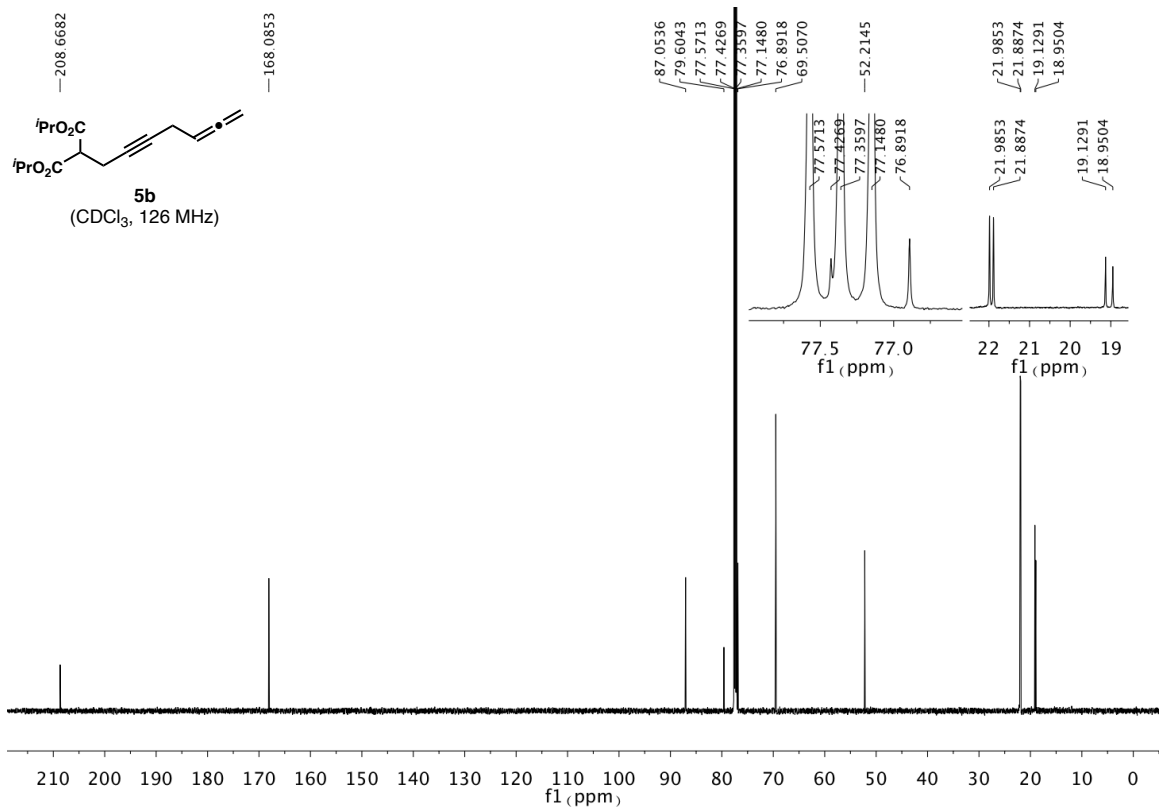

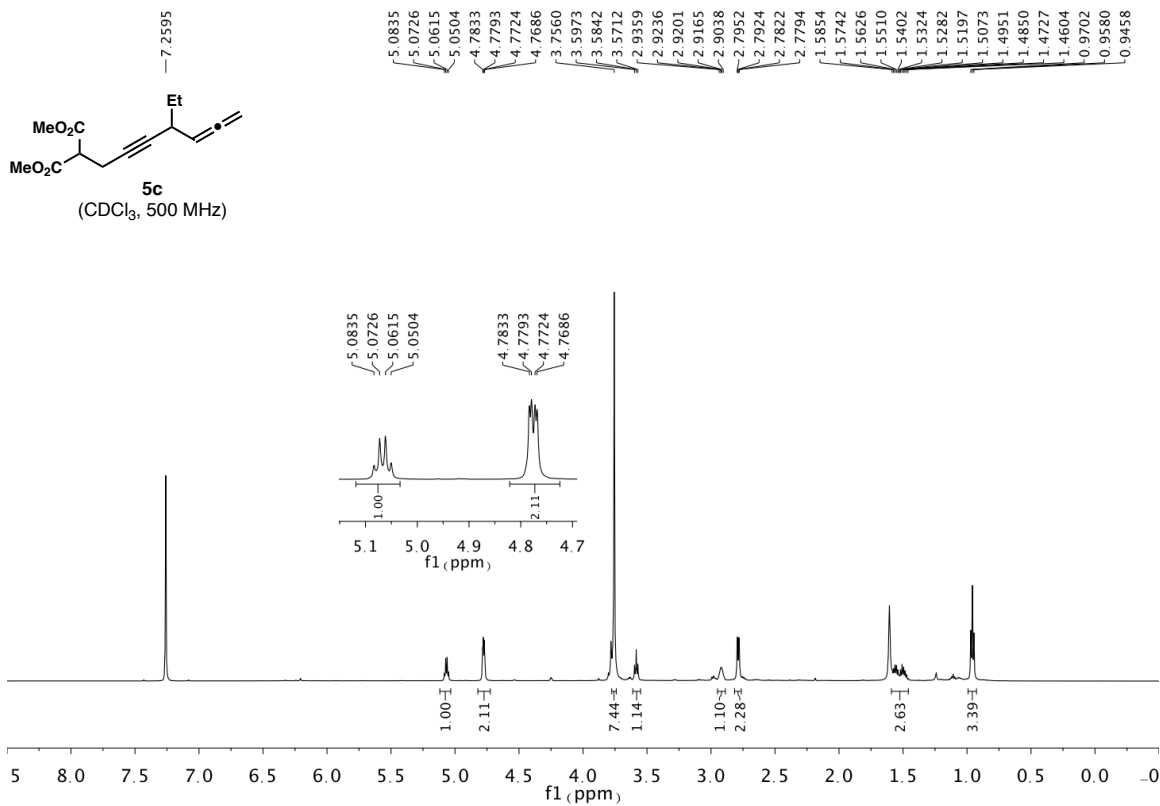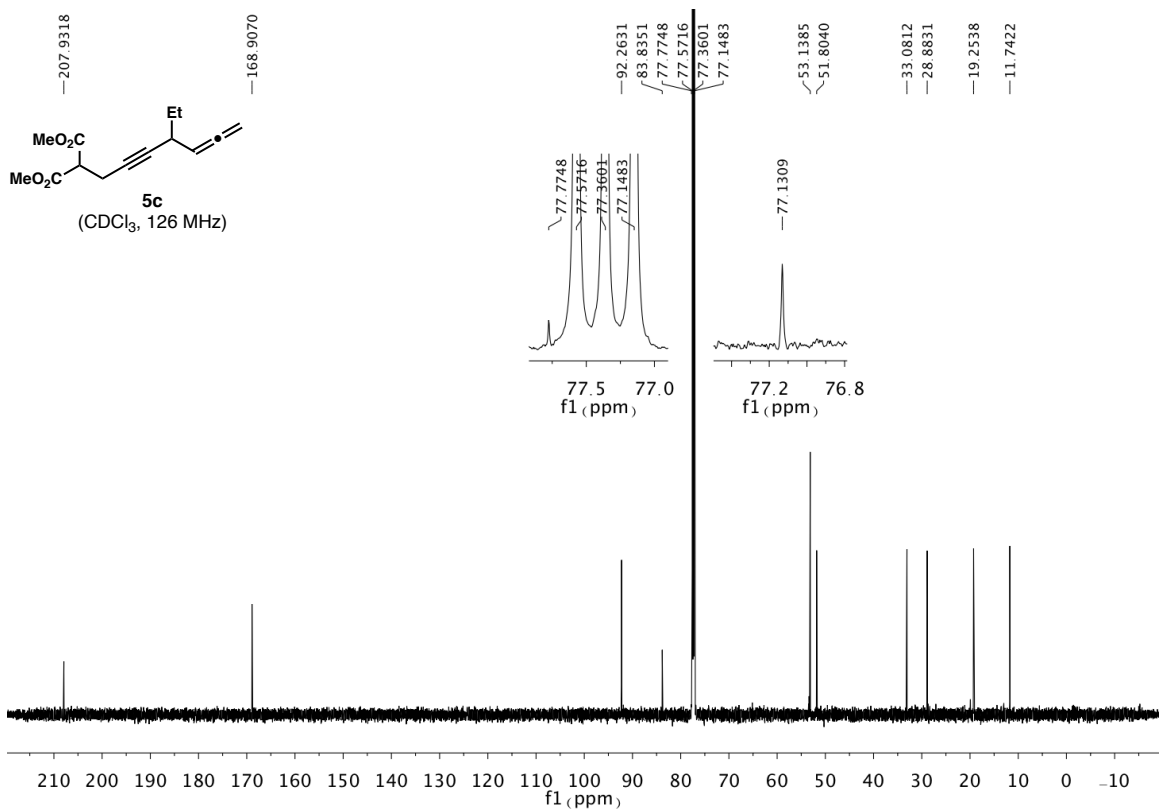

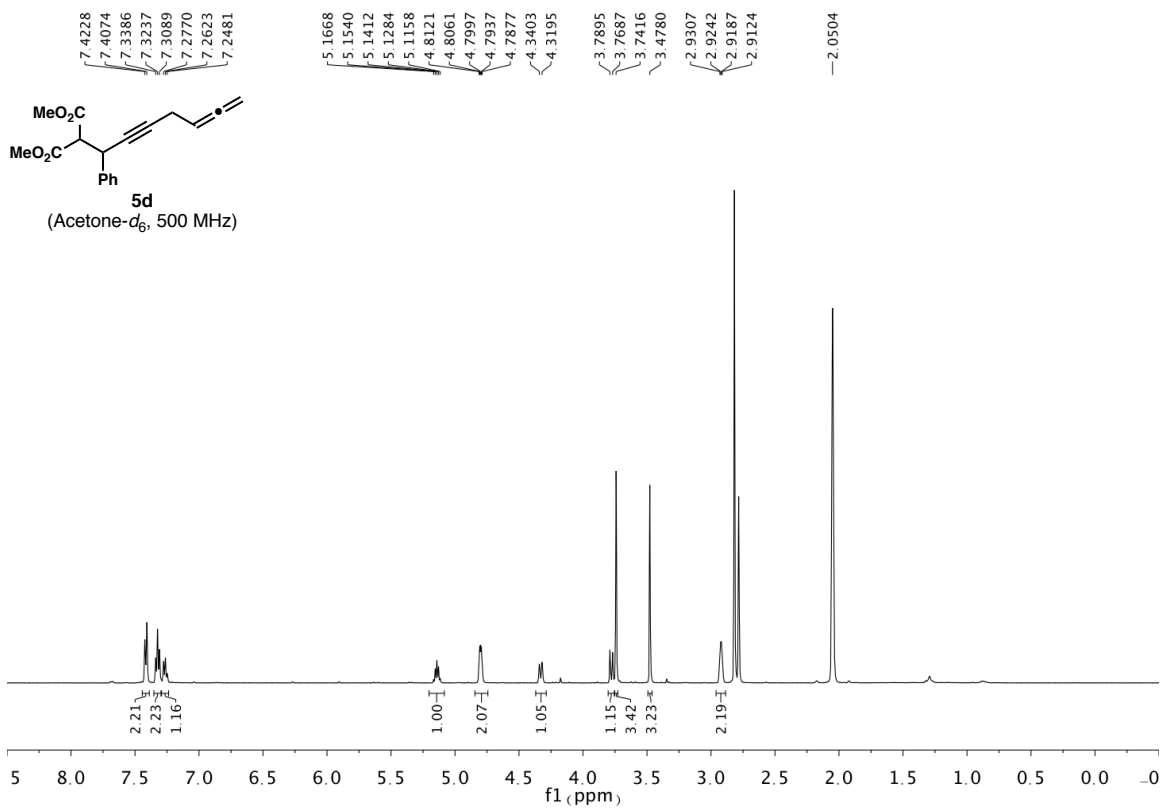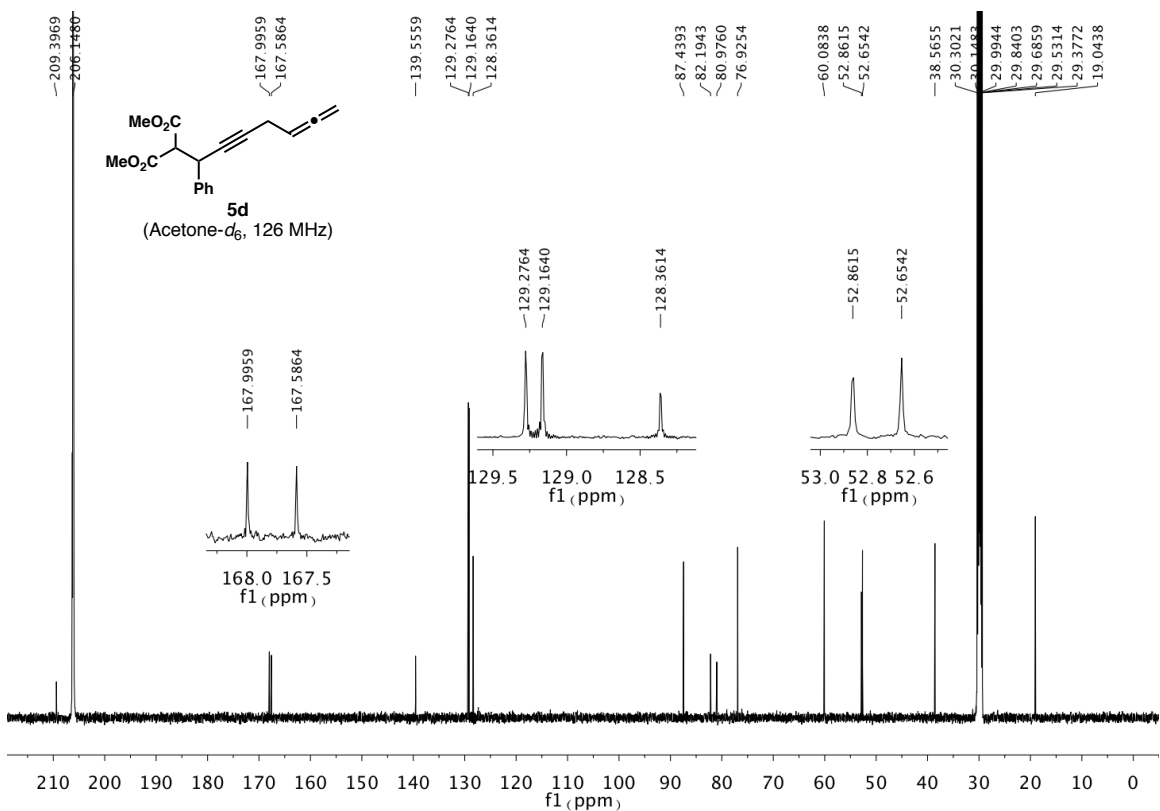



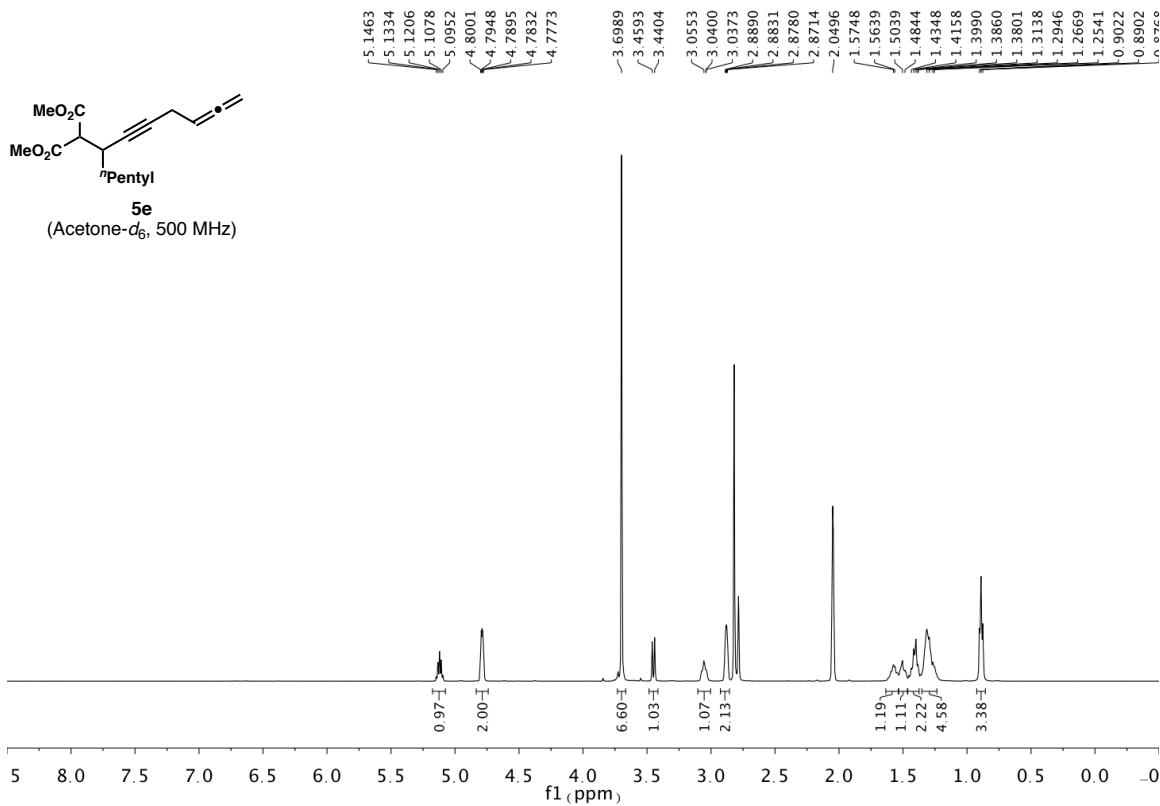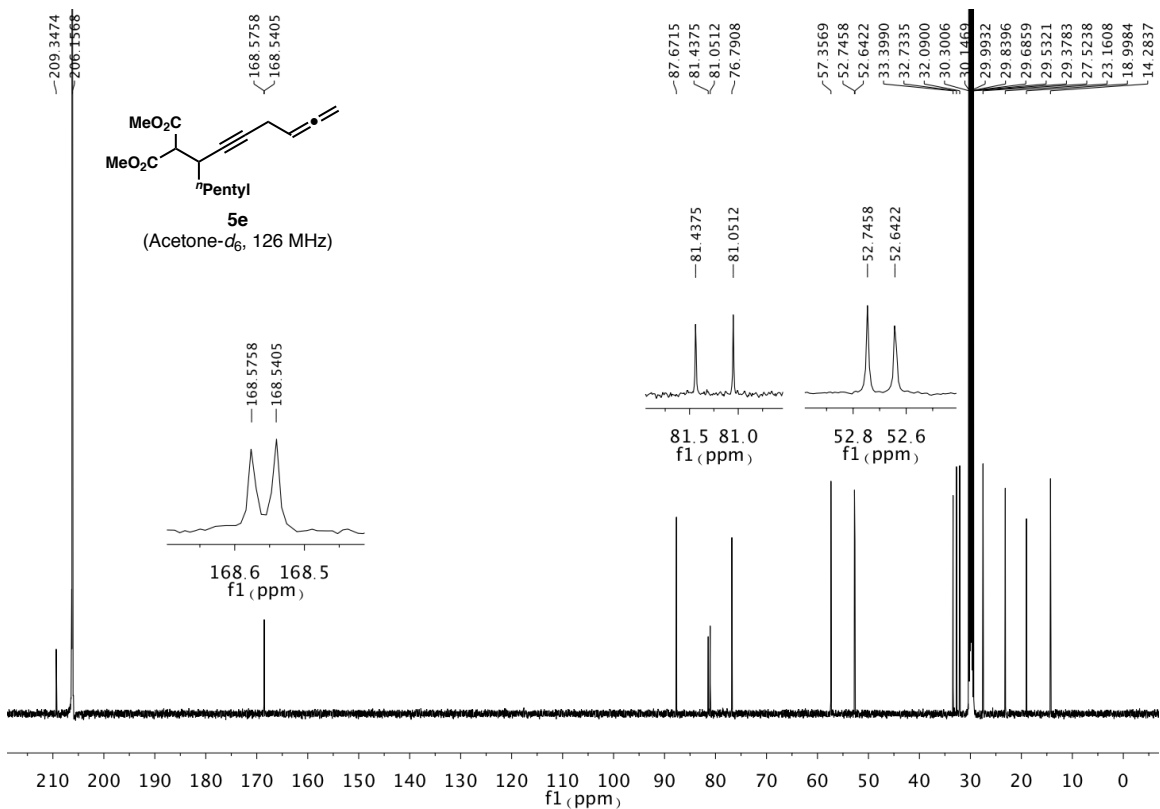

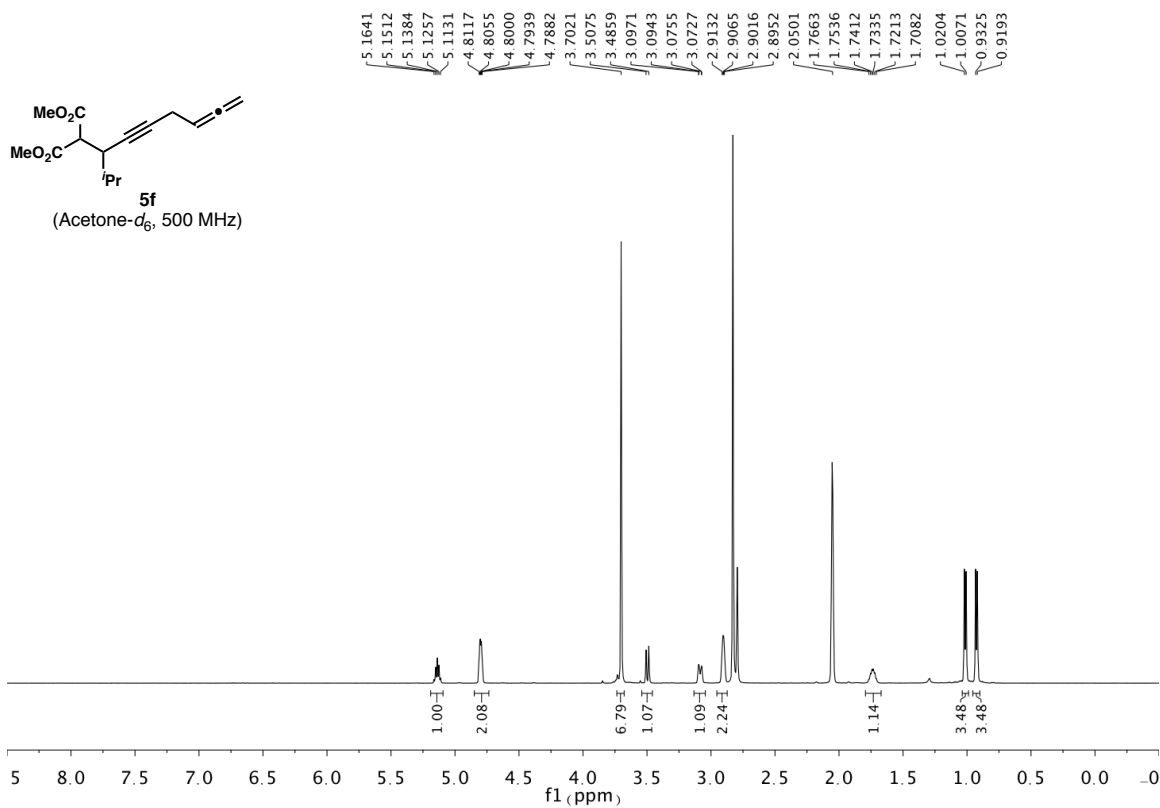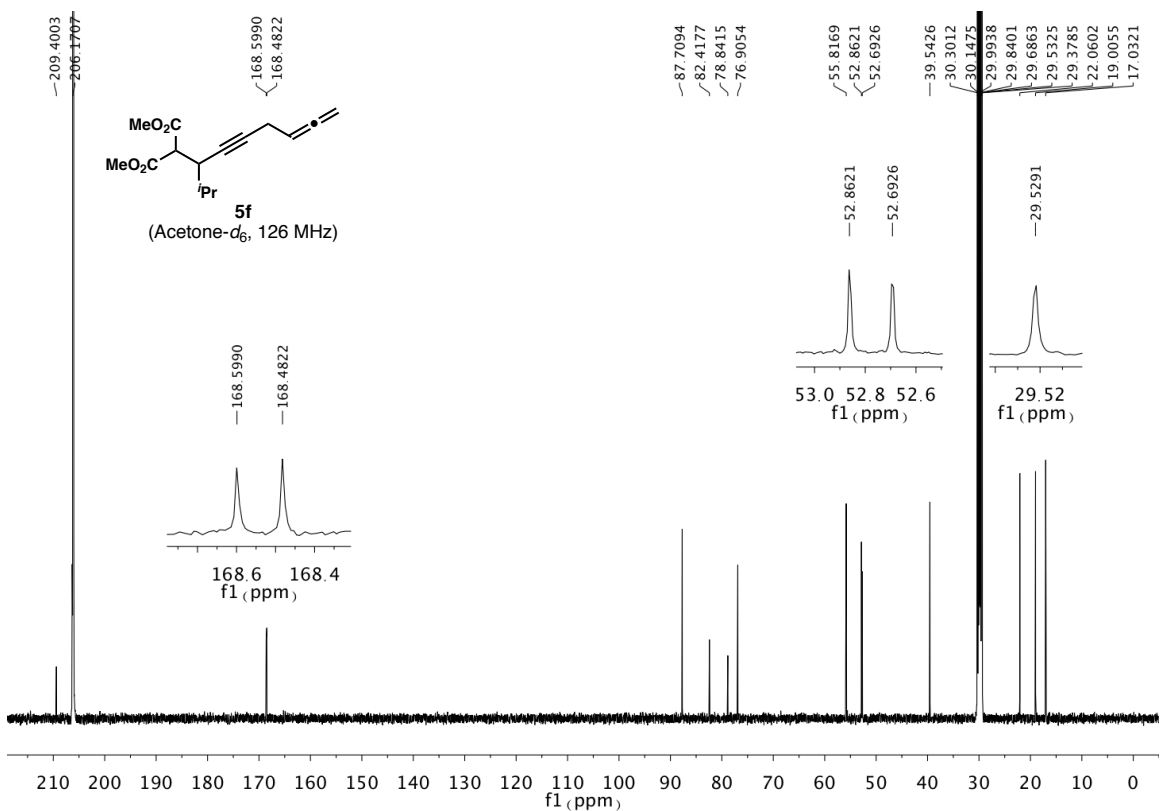

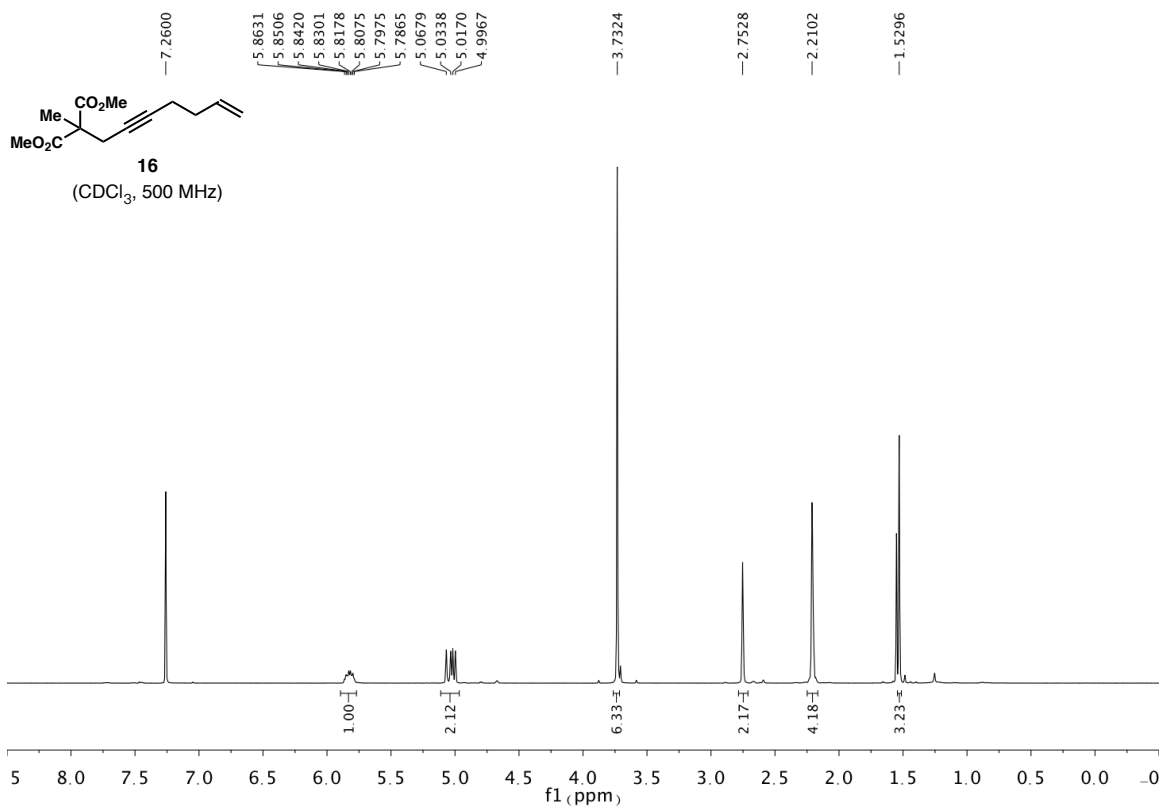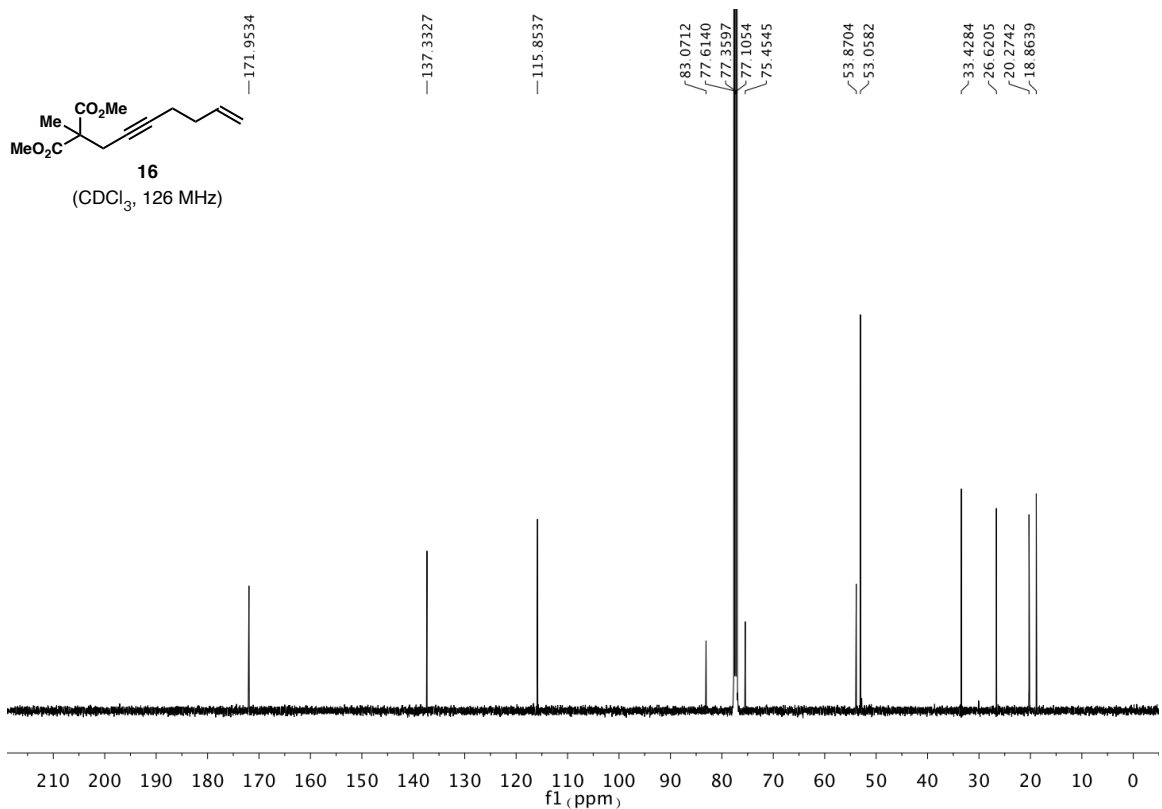

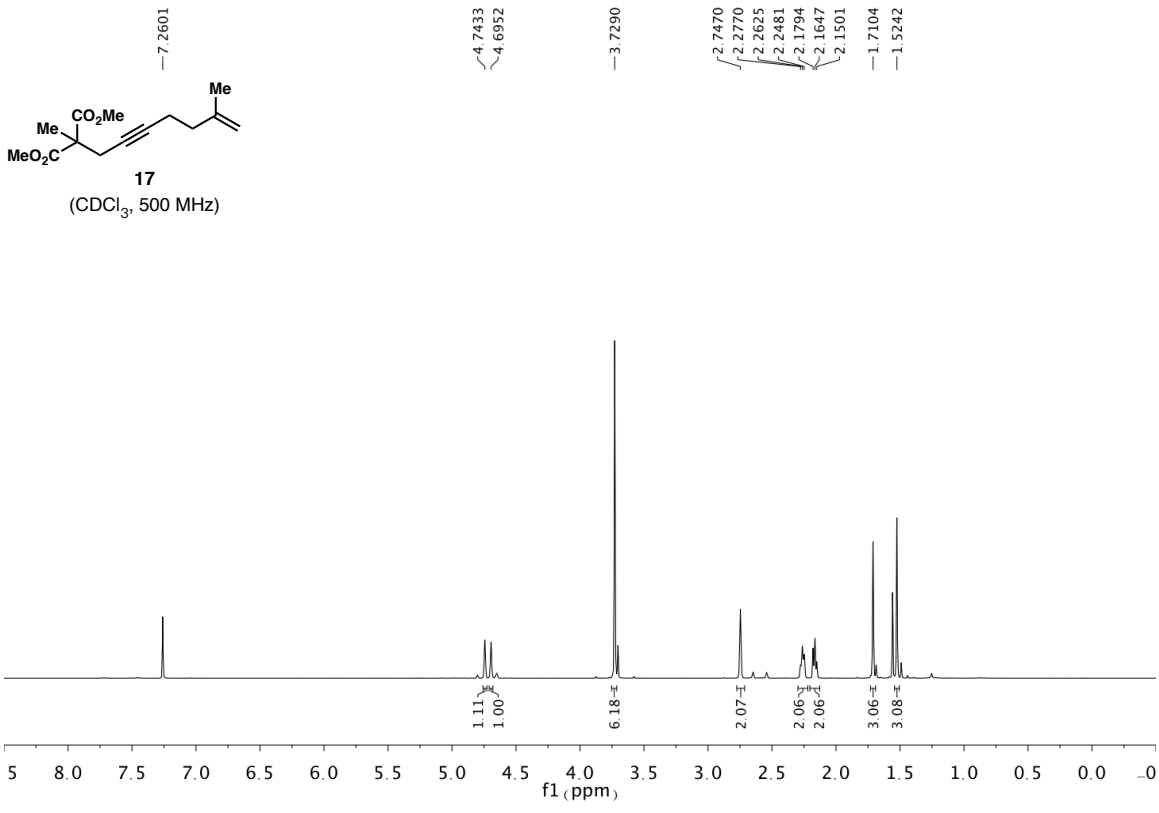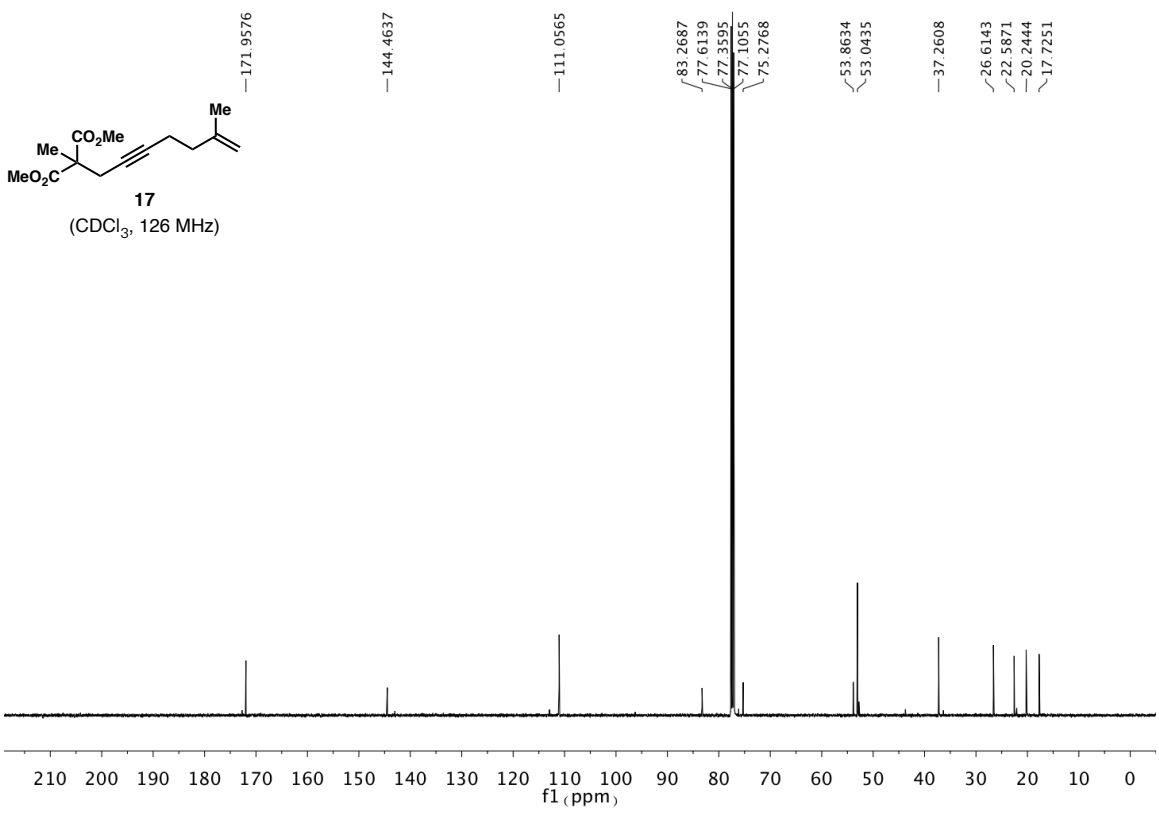

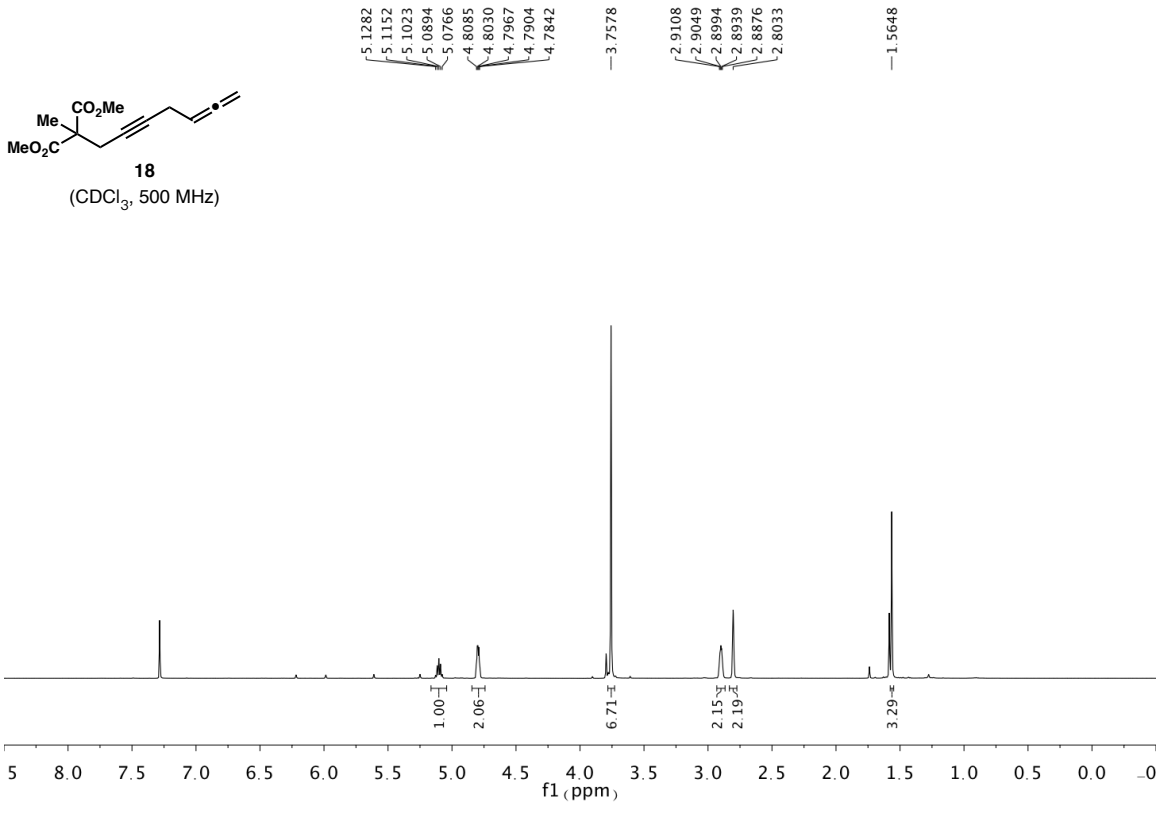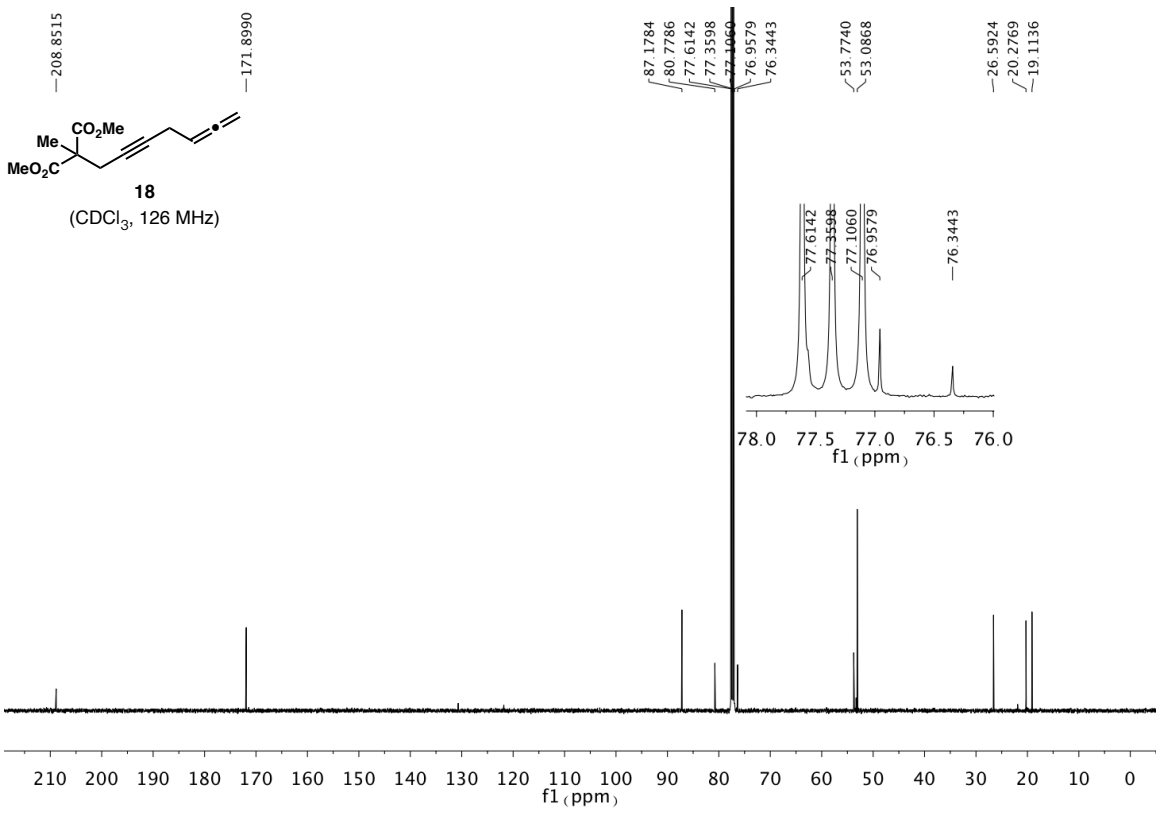

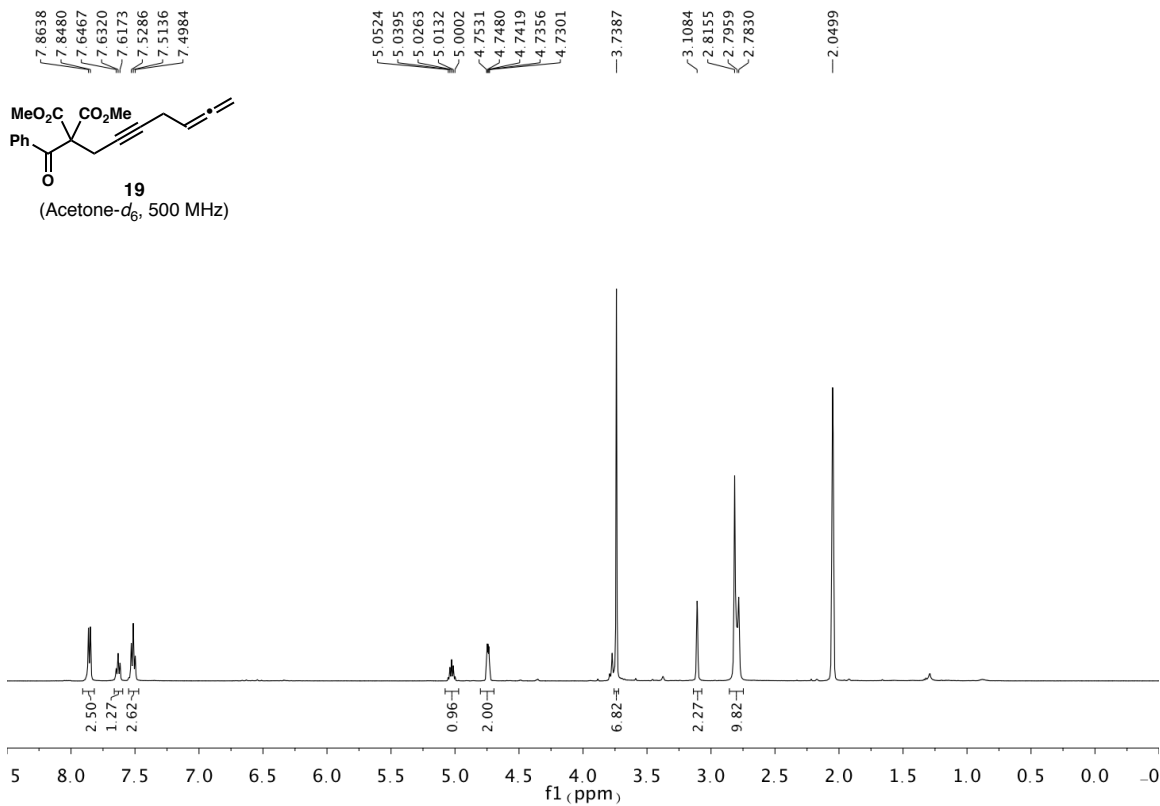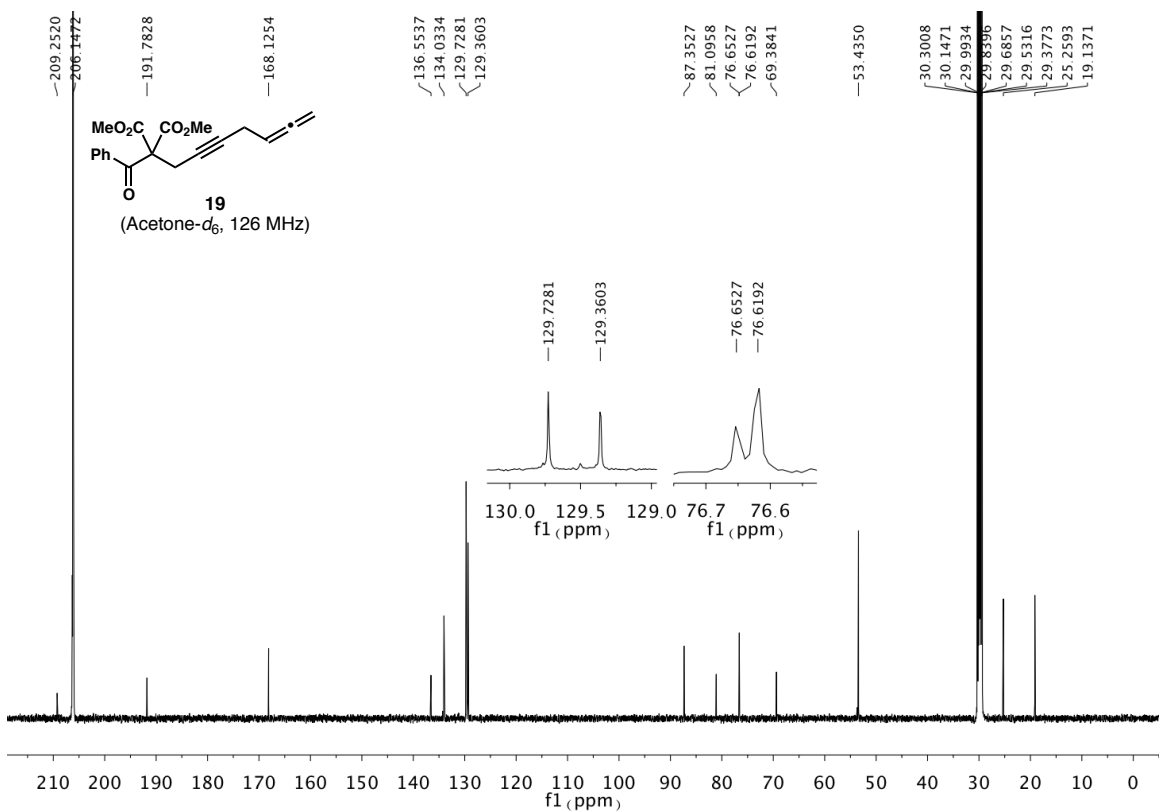

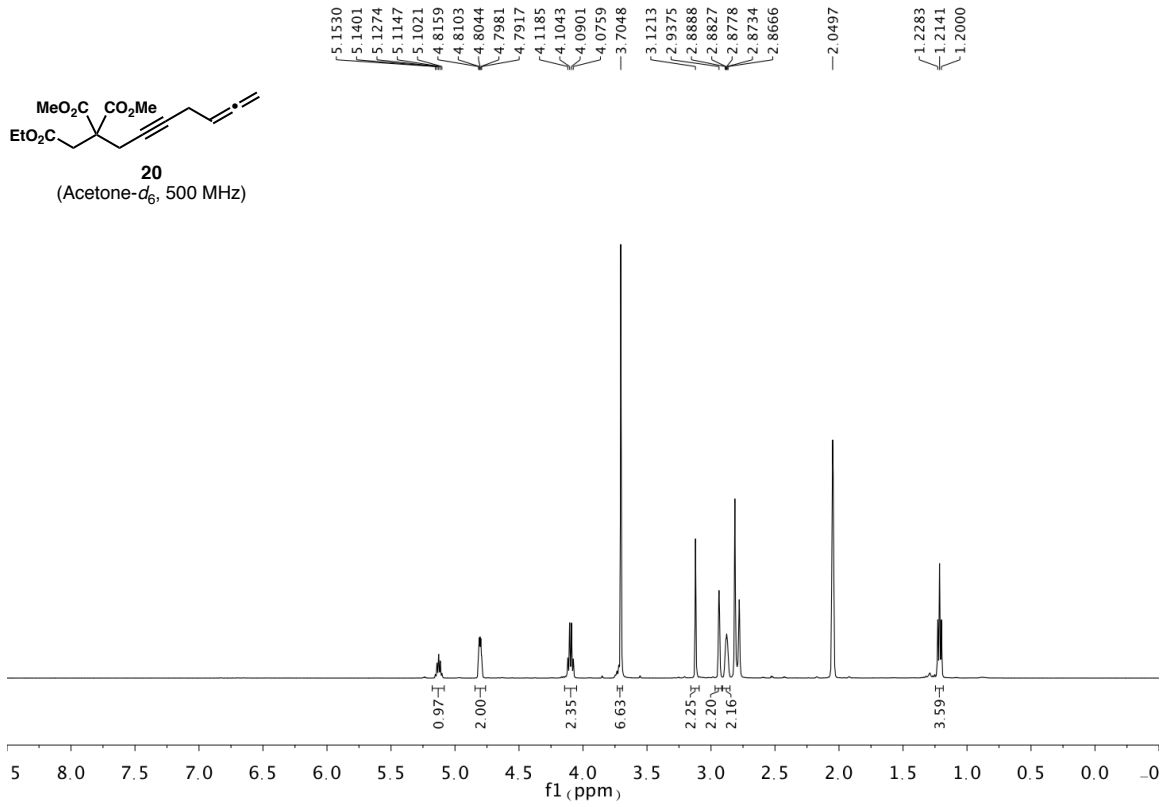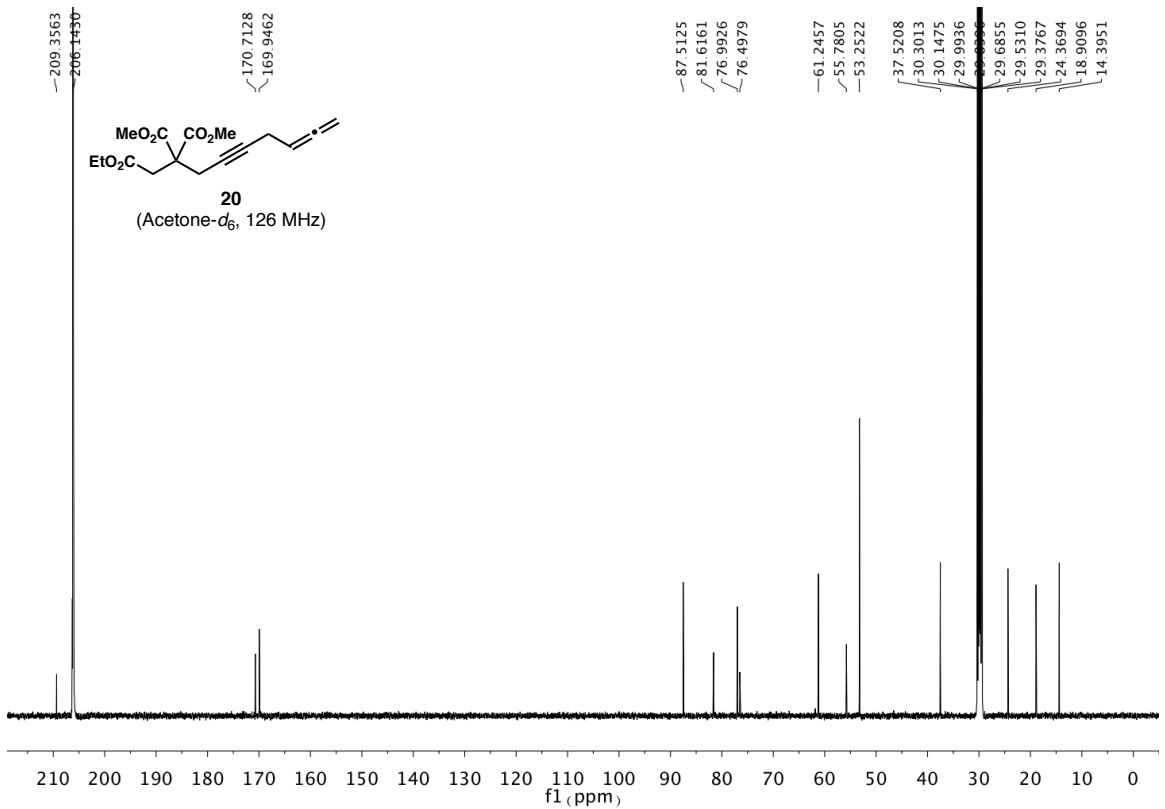

Supplement: d1cc03823k1.pdf [file d1cc03823k1.pdf]
